# 1 Raman2RNA: Live-cell label-free prediction of single-cell RNA 2 expression profiles by Raman microscopy

3 Koseki J. Kobayashi-Kirschvink<sup>1,2,‡</sup>, Shreya Gaddam<sup>1,9</sup>, Taylor James-Sorenson<sup>1</sup>, Emanuelle  
4 Grody<sup>1,3</sup>, Johain R. Ounadjela<sup>1,3</sup>, Baoliang Ge<sup>4</sup>, Ke Zhang<sup>5</sup>, Jeon Woong Kang<sup>2</sup>, Ramnik Xavier<sup>1,6</sup>,  
5 Peter T. C. So<sup>2,4</sup>, Tommaso Biancalani<sup>1,9,†,‡</sup>, Jian Shu<sup>1,3,5,†,‡</sup>, Aviv Regev<sup>1,7,8,9,†,‡</sup>

6 <sup>1</sup>Broad Institute of MIT and Harvard, Cambridge, MA 02142, USA

7 <sup>2</sup>Laser Biomedical Research Center, G. R. Harrison Spectroscopy Laboratory, Massachusetts Institute of  
8 Technology, Cambridge, MA 02139, USA

9 <sup>3</sup>Whitehead Institute for Biomedical Research, Cambridge, MA 02142, USA

10 <sup>4</sup>Department of Mechanical and Biological Engineering, Massachusetts Institute of Technology, Cambridge, MA  
11 02139, USA

12 <sup>5</sup>Cutaneous Biology Research Center, Massachusetts General Hospital, Harvard Medical School, Boston, MA  
13 02129, USA

14 <sup>6</sup>Center for Computational and Integrative Biology and Department of Molecular Biology, Massachusetts General  
15 Hospital, Boston, Massachusetts 02114, USA

16 <sup>7</sup>Department of Biology, Massachusetts Institute of Technology, Cambridge, MA 02139, USA

17 <sup>8</sup>Howard Hughes Medical Institute, Cambridge, MA 02142, USA

18 <sup>9</sup>Present address: Genentech, 1 DNA Way, South San Francisco, CA 94080, USA

19 <sup>†</sup>These authors contributed equally

20 <sup>‡</sup>Correspondence: [kkobayas@broadinstitute.org](mailto:kkobayas@broadinstitute.org); [aviv.regev.sc@gmail.com](mailto:aviv.regev.sc@gmail.com); [jian.shu@mgh.harvard.edu](mailto:jian.shu@mgh.harvard.edu);  
21 [tbiancal@broadinstitute.org](mailto:tbiancal@broadinstitute.org);

22

23

24 **Error! Hyperlink reference not valid.**Single cell RNA-Seq (scRNA-seq) and other profiling  
25 assays have opened new windows into understanding the properties, regulation, dynamics,  
26 and function of cells at unprecedented resolution and scale. However, these assays are  
27 inherently destructive, precluding us from tracking the temporal dynamics of live cells, in  
28 cell culture or whole organisms. Raman microscopy offers a unique opportunity to  
29 comprehensively report on the vibrational energy levels of molecules in a label-free and non-  
30 destructive manner at a subcellular spatial resolution, but it lacks in genetic and molecular  
31 interpretability. Here, we developed Raman2RNA (R2R), an experimental and  
32 computational framework to infer single-cell expression profiles in live cells through label-  
33 free hyperspectral Raman microscopy images and multi-modal data integration and domain  
34 translation. We used spatially resolved single-molecule RNA-FISH (smFISH) data as  
35 anchors to link scRNA-seq profiles to the paired spatial hyperspectral Raman images, and  
36 trained machine learning models to infer expression profiles from Raman spectra at the  
37 single-cell level. In reprogramming of mouse fibroblasts into induced pluripotent stem cells  
38 (iPSCs), R2R accurately ( $r>0.96$ ) inferred from Raman images the expression profiles of  
39 various cell states and fates, including iPSCs, mesenchymal-epithelial transition (MET) cells,  
40 stromal cells, epithelial cells, and fibroblasts. R2R outperformed inference from brightfield  
41 images, showing the importance of spectroscopic content afforded by Raman microscopy.  
42 Raman2RNA lays a foundation for future investigations into exploring single-cell genome-  
43 wide molecular dynamics through imaging data, *in vitro* and *in vivo*.

44 Keywords: Raman microscopy, single-cell transcriptomics, multi-domain translation

45

## 46 **Main**

47 Cellular states and functions are determined by a dynamic balance between intrinsic and extrinsic  
48 programs. Dynamic processes such as cell growth, stress responses, differentiation, and  
49 reprogramming are not determined by a single gene, but by the orchestrated temporal expression  
50 and function of multiple genes organized in programs and their interactions with other cells and  
51 the surrounding environment<sup>1</sup>. To understand how cells change their states in physiological and  
52 pathological conditions it is essential to decipher the dynamics of the underlying gene programs.

53 Despite major advances in single cell genomics and microscopy, we still cannot track live cells  
54 and tissues at the genomic level. On the one hand, single cell and spatial genomics have provided  
55 a view of gene programs and cell states at unprecedented scale and resolution<sup>1</sup>, but these  
56 measurement methods are destructive, and involve tissue fixation and freezing and/or cell lysis,  
57 precluding us from directly tracking the dynamics of full molecular profiles in live cells or  
58 organisms. While advanced computational methods, such as pseudo-time algorithms (*e.g.*,  
59 Monocle<sup>2</sup>, Waddington-OT<sup>3</sup>) and velocity-based methods (*e.g.*, *velocyto*<sup>4</sup>, *scVelo*<sup>5</sup>), can infer  
60 dynamics from snapshots of molecular profiles, they rely on assumptions that remain challenging  
61 to verify experimentally<sup>6</sup>. On the other hand, fluorescent reporters can be used to monitor the  
62 dynamics of individual genes and programs within live cells, but are limited in the number of  
63 targets they can report<sup>7</sup>, must be chosen ahead of the experiment and often involve genetically  
64 engineered cells. Moreover, the vast majority of dyes and reporters require fixation or can interfere  
65 with nascent biochemical processes and alter the natural state of the gene of interest<sup>7</sup>. Therefore,  
66 it remains technically challenging to dynamically monitor the activity of a large number of genes  
67 simultaneously.

68 Raman microscopy opens a unique opportunity for monitoring live cells and tissues, as it  
69 collectively reports on the vibrational energy levels of molecules in a label-free and non-  
70 destructive manner at a subcellular spatial resolution, thus providing molecular fingerprints of  
71 cells<sup>8</sup>. Pioneering research has demonstrated that Raman microscopy can be used for  
72 characterizing cell types and cell states<sup>8</sup>, non-destructively diagnosing pathological specimens  
73 such as tumors<sup>9</sup>, characterizing the developmental states of embryos<sup>10</sup>, and identifying bacteria  
74 with antibiotic resistance<sup>11</sup>. However, the complex and high-dimensional nature of the spectra, the  
75 spectral overlaps of biomolecules such as proteins and nucleic acids, and the lack of unified  
76 computational frameworks have hindered the decomposition of the underlying molecular  
77 profiles<sup>7,8</sup>.

78 To address this challenge and leverage the complementary strengths of Raman microscopy and  
79 scRNA-Seq, we developed Raman2RNA (R2R), an experimental and computational framework  
80 for inferring single-cell RNA expression profiles from label-free non-destructive Raman  
81 hyperspectral images (**Fig. 1**). R2R takes as input spatially resolved hyperspectral Raman images  
82 from live cells, smFISH data of selected markers from the same cells, and scRNA-seq from the  
83 same biological system. R2R then uses the smFISH data as an anchor to learn a model that links  
84 spatially resolved hyperspectral Raman images to scRNA-seq. Finally, from this model, R2R then  
85 computationally infers the anchor smFISH measurements from hyperspectral Raman images and  
86 then the single-cell expression profiles. The result is a label-free live-cell inference of single-cell  
87 expression profiles.

88 To facilitate data acquisition, we developed a high-throughput multi-modal spontaneous Raman  
89 microscope that enables automated acquisition of Raman spectra, brightfield, and fluorescent  
90 images. In particular, we integrated Raman microscopy optics to a fluorescence microscope, where



91 high-speed galvo mirrors and motorized stages were combined to achieve a large field of view  
92 (FOV) scanning, and where dedicated electronics automate measurements across multiple  
93 modalities (**Extended Data Fig. 1-2, Methods**).

94 We first demonstrated that R2R can infer profiles of two distinct cell types: mouse induced  
95 pluripotent stem cells (iPSCs) expressing an endogenous *Oct4*-GFP reporter and mouse  
96 fibroblasts<sup>12</sup>. To this end, we mixed the cells in equal proportions, plated them in a gelatin-coated  
97 quartz glass-bottom Petri dish, and performed live-cell Raman imaging, along with fluorescent  
98 imaging of live-cell nucleus staining dye (Hoechst 33342) for cell segmentation and image  
99 registration, and an iPSC marker gene, *Oct4*-GFP (**Fig. 2a**). The excitation wavelength for our  
100 Raman microscope (785 nm) was distant enough from the GFP Stokes shift emission, such that  
101 there was no interference with the cellular Raman spectra (**Extended Data Fig. 3**). Furthermore,  
102 there was no notable photo-toxicity induced in the cells. After Raman and fluorescence imaging,  
103 we fixed and permeabilized the cells and performed smFISH (with hybridization chain reaction  
104 (HCR<sup>13</sup>), **Methods**) of marker genes for mouse iPSCs (*Nanog*) and fibroblasts (*Colla1*). We  
105 registered the nuclei stains, GFP images, HCR images, and Raman images through either  
106 polystyrene control bead images or reference points marked under the glass bottom dishes  
107 (**Extended Data Fig. 4, Methods**).

108 The Raman spectra distinguished the two cell populations in a manner congruent with the  
109 expression of their respective reporter (measured live or by smFISH in the same cells), as reflected  
110 by a low-dimensional embedding of hyperspectral Raman data (**Fig. 2b**). Specifically, we focused  
111 on the fingerprint region of Raman spectra (600-1800  $\text{cm}^{-1}$ , 930 of the 1,340 features in a Raman  
112 spectrum), where most of the signatures from various key biomolecules, such as proteins, nucleic  
113 acids, and metabolites, lie<sup>8</sup>. After basic preprocessing, including cosmic-ray and background

114 removal and normalization, we aggregated Raman spectra that are confined to the nuclei, obtaining  
115 a 930-dimensional Raman spectroscopic representation for each cell's nucleus. We then visualized  
116 these Raman profiles in an embedding in two dimensions using Uniform Manifold Approximation  
117 and Projection (UMAP)<sup>14</sup> and labeled cells with the gene expression levels that were concurrently  
118 measured by either an *Oct4*-GFP reporter or smFISH (**Fig. 2b**). The cells separated clearly in their  
119 Raman profiles in a manner consistent with their gene expression characteristics, forming two  
120 main subsets in the embedding, one with cells with high *Oct4* and *Nanog* expression (iPSCs  
121 markers) and another with cells with relatively high *Coll1a1* expression (fibroblasts marker),  
122 indicating that Raman spectra reflect cell-intrinsic expression differences (**Fig. 2b**).

123 We further successfully trained a classifier to classify the 'on' or 'off' expression states of *Oct4*,  
124 *Nanog* and *Coll1a1* in each cell based on its Raman profile (**Methods**). We trained a logistic  
125 regression classifier with 50% of the data and held out 50% for testing. We predicted *Oct4* and  
126 *Nanog* expression states with high accuracy on the held-out test data (area under the receiver  
127 operating characteristic curve (AUROC) = 0.98 and 0.95, respectively; **Fig. 2c**), indicating that  
128 expression of iPSC markers can be predicted confidently from Raman spectra of live, label-free  
129 cells. We also successfully classified the expression state of the fibroblast marker *Coll1a1*  
130 (AUROC = 0.87; **Fig. 2c**), albeit with lower confidence, which is consistent with the lower contrast  
131 in *Coll1a1* expression (**Fig. 2b**) between iPSC (*Oct4*<sup>+</sup> or *Nanog*<sup>+</sup> cells) vs. non-iPSCs, compared  
132 to *Oct4* or *Nanog*. Most misclassifications occurred when the ground truth expression levels were  
133 near the threshold of the classifier, showing that misclassifications were likely due to the  
134 uncertainty in the ground truth expression level (**Extended Data Fig. 5**).

135 Next, we asked if the Raman images could predict entire expression profiles non-destructively at  
136 single-cell resolution. To this end, we aimed to reconstruct scRNA-seq profiles from Raman

137 images by multi-modal data integration and translation, using multiplex smFISH data to anchor  
138 between the Raman images and scRNA-seq profiles (**Fig. 3a**). As a test case, we focused on the  
139 mouse iPSC reprogramming model system, where we have previously generated ~250,000  
140 scRNA-seq profiles at ½ day intervals throughout an 18 day, 36 time point time course of  
141 reprogramming<sup>3</sup> (**Methods**). We used Waddington-OT<sup>3</sup> (WOT) to select from the scRNA-seq  
142 profiles nine anchor genes that represent diverse cell types that emerge during reprogramming  
143 (iPSCs: *Nanog*, *Utf1* and *Epcam*; MET and neural: *Nnat* and *Fabp7*; epithelial: *Krt7* and *Peg10*;  
144 stromal: *Bgn* and *Colla1*; **Methods**). We performed live-cell Raman imaging from day 8 of  
145 reprogramming, in which distinct cell types begin to emerge<sup>3</sup>, up to day 14.5, at half-day intervals,  
146 totaling 14 time points (**Methods**). We imaged ~500 cells per plate at 1µm spatial resolution.  
147 Finally, we fixed cells immediately after each Raman imaging time point followed by smFISH on  
148 the 9 anchor genes (**Methods**).

149 Strikingly, a low dimensional representation of the Raman profiles showed that they encoded  
150 similar temporal dynamics to those observed with scRNA-seq during reprogramming (**Fig. 3b,c**,  
151 **Extended Data Fig. 6**), indicating that they may qualitatively mirror scRNA-seq.

152 Integrating Raman and scRNA-seq profiles (**Methods**), R2R then learned a model that can infer  
153 an scRNA-seq profile for each Raman imaged cell, by first predicting smFISH anchors from the  
154 Raman profiles using Catboost<sup>15</sup> (**Methods**) and then using our Tangram<sup>16</sup> method to map from  
155 the anchors to full scRNA-seq profiles (**Fig. 1, Fig. 3d-f**). In the first step, we averaged the smFISH  
156 signal within a nucleus to represent a single nucleus's expression level. As we conducted smFISH  
157 of 9 genes, the result was a 9-dimensional smFISH profile for each single nucleus. Then, Raman  
158 profiles were translated to these 9-dimensional profiles with Catboost<sup>15</sup>, a non-linear regression  
159 model, using 50% of the Raman and smFISH profiles as training data.

160 In the second step, we mapped these anchor smFISH profiles to full scRNA-seq profiles using  
161 Tangram, yielding well-predicted single cell RNA profiles, as supported by several lines of  
162 evidence. First, we performed leave-one-out cross-validation (LOOCV) analysis, in which we used  
163 eight out of the nine anchor genes to integrate Raman with scRNA-seq, and compared the predicted  
164 expression of the remaining genes to its smFISH measurements. The predicted left-out genes based  
165 on scRNA-seq showed a significant correlation with the measured smFISH expression for any left-  
166 out gene (Pearson  $r \sim 0.7$ ,  $p$ -value  $< 10^{-100}$ , **Fig. 3d**). Notably, when we analogously applied a  
167 modified U-net<sup>17</sup> to infer smFISH profiles from brightfield (**Extended Data Fig. 15, Methods**),  
168 we observed a poor, near-random prediction of expression profiles for all 9 genes in leave-one-out  
169 cross-validation ( $r < 0.15$ ), indicating that, unlike Raman spectra, brightfield z-stack images either  
170 do not have the necessary information to infer expression profiles, or require more data. Second,  
171 we compared the real (scRNA-seq measured) and R2R predicted expression profiles averaged  
172 across cells of the same cell type (“pseudobulk” for each of iPSCs, epithelial cells, stromal cells,  
173 and MET). Here, we obtained the “ground truth” cell types of the R2R profiles by transferring  
174 scRNA-seq annotations to the matching smFISH profiles using Tangram’s label transfer function.  
175 Then, based on the labels, we averaged R2R’s predicted profiles across the cells of a single cell  
176 type. The two profiles (R2R-inferred and scRNA-seq pseudo-bulk per cell type) showed high  
177 correlations (Pearson’s  $r > 0.96$ ) (**Fig. 3e,f, Extended Data Fig. 7**), demonstrating the accuracy of  
178 R2R at the cell type level. Furthermore, projecting the R2R predicted profiles of each cell onto an  
179 embedding learned from the real scRNA-seq shows that the predicted profiles span the key cell  
180 types as captured in real profiles (**Fig. 3g-j, Extended Data Fig. 8-12**). We note that the predicted  
181 profiles had lower variance compared to real scRNA-seq. As this is observed even when co-  
182 embedding only smFISH and scRNA-seq measurements (with no Raman data or projection,

183 **Extended Data Fig. 13**), we believe it mostly reflects the limited number and domain  
184 maladaptation of the smFISH anchor genes used for integration. Given the similarity of the  
185 separate embeddings of Raman and scRNA-seq profiles, future studies without anchors could  
186 address this.

187 Lastly, we calculated feature importance scores in R2R predictions (**Methods**) and identified  
188 Raman spectral features correlated with expression levels (**Fig. 3k, Extended Data Fig. 14**). For  
189 example, Raman bands at approximately  $752\text{cm}^{-1}$  (C-C, Try, cytochrome),  $1004\text{ cm}^{-1}$  (CC, Phe,  
190 Tyr), and  $1445\text{ cm}^{-1}$  ( $\text{CH}_2$ , lipids) contributed to predicting iPSCs-related expression profiles,  
191 which is consistent with previous research that employed single cell Raman spectra to identify  
192 mouse embryonic stem cells (ESCs)<sup>18</sup> (**Fig. 3k**). The contributions of these bands were either  
193 suppressed or increased for other cell types, such as stromal or epithelial cells (**Extended Data**  
194 **Fig. 14**).

195 In conclusion, we reported R2R, a label-free non-destructive framework for inferring expression  
196 profiles at single-cell resolution from Raman spectra of live cells, by integrating Raman  
197 hyperspectral images with scRNA-seq data through paired smFISH measurements and multi-  
198 modal data integration and translation. We inferred single-cell expression profiles with high  
199 accuracy, based on both averages within cell types and co-embeddings of individual profiles. We  
200 further showed that predictions using brightfield z-stacks had poor performance, indicating the  
201 importance of Raman microscopy for predicting expression profiles.

202 R2R can be further developed in several ways. First, the throughput of single-cell Raman  
203 microscopy is still limited. In this pilot study, we profiled  $\sim 6,000$  cells in total. By using emerging  
204 vibrational spectroscopy techniques, such as Stimulated Raman Scattering microscopy<sup>19</sup> or photo-

205 thermal microscopy<sup>20,21</sup>, we envision increasing throughput by several orders of magnitude, to  
206 match the throughput of massively parallel single cell genomics. Second, because molecular  
207 circuits and gene regulation are structured, with strong co-variation in gene expression profiles  
208 across cells, we can leverage the advances in computational microscopy to infer high-resolution  
209 data from low-resolution data, such as by using compressed sensing, to further increase  
210 throughput<sup>22</sup>. Third, increasing the number of anchor genes (*e.g.*, by seqFISH<sup>23</sup>, merFISH<sup>24</sup>,  
211 STARmap<sup>25</sup>, or ExSeq<sup>26</sup>) can increase our prediction accuracy and capture more single-cell  
212 variance. Additionally, with single-cell multi-omics, we can project other modalities, such as  
213 scATAC-seq from Raman spectra. Finally, given the similarity in the overall independent  
214 embedding of Raman and scRNA-seq profiles, we expect computational methods such as multi-  
215 domain translation<sup>27</sup> to allow mapping between Raman spectra and molecular profiles without  
216 measuring any anchors *in situ*. Overall, with further advances in single-cell genomics, imaging,  
217 and machine learning, Raman2RNA could allow us to non-destructively infer omics profiles at  
218 scale *in vitro*, and possibly *in vivo* in living organisms.

219

## 220 **Materials and Methods**

### 221 **Mouse fibroblast reprogramming**

222 OKSM secondary mouse embryonic fibroblasts (MEFs) were derived from E13.5 female embryos  
223 with a mixed B6;129 background. The cell line used in this study was homozygous for ROSA26-  
224 M2rtTA, homozygous for a polycistronic cassette carrying *Oct4*, *Klf4*, *Sox2*, and *Myc* at the  
225 *Coll1a1* 3' end, and homozygous for an EGFP reporter under the control of the *Oct4* promoter.  
226 Briefly, MEFs were isolated from E13.5 embryos from timed-matings by removing the head,  
227 limbs, and internal organs under a dissecting microscope. The remaining tissue was finely minced  
228 using scalpels and dissociated by incubation at 37°C for 10 minutes in trypsin-EDTA  
229 (ThermoFisher Scientific). Dissociated cells were then plated in MEF medium containing DMEM  
230 (ThermoFisher Scientific), supplemented with 10% fetal bovine serum (GE Healthcare Life  
231 Sciences), non-essential amino acids (ThermoFisher Scientific), and GlutaMAX (ThermoFisher  
232 Scientific). MEFs were cultured at 37°C and 4% CO<sub>2</sub> and passaged until confluent. All procedures,  
233 including maintenance of animals, were performed according to a mouse protocol (2006N000104)  
234 approved by the MGH Subcommittee on Research Animal Care<sup>3</sup>.

235 For the reprogramming assay, 50,000 low passage MEFs (no greater than 3-4 passages from  
236 isolation) were seeded in 14 3.5cm quartz glass-bottom Petri dishes (Waken B Tech) coated with  
237 gelatin. These cells were cultured at 37°C and 5% CO<sub>2</sub> in reprogramming medium containing  
238 KnockOut DMEM (GIBCO), 10% knockout serum replacement (KSR, GIBCO), 10% fetal bovine  
239 serum (FBS, GIBCO), 1% GlutaMAX (Invitrogen), 1% nonessential amino acids (NEAA,  
240 Invitrogen), 0.055 mM 2-mercaptoethanol (Sigma), 1% penicillin-streptomycin (Invitrogen) and  
241 1,000 U/ml leukemia inhibitory factor (LIF, Millipore). Day 0 medium was supplemented with 2

242 mg/mL doxycycline Phase-1 (Dox) to induce the polycistronic OKSM expression cassette. The  
243 medium was refreshed every other day. On day 8, doxycycline was withdrawn. Fresh medium was  
244 added every other day until the final time point on day 14. One plate was taken every 0.5 days  
245 after day 8 (D8-D14.5) for Raman imaging and fixed with 4% formaldehyde immediately after for  
246 HCR.

### 247 **High-throughput multi-modal Raman microscope**

248 Due to the lack of commercial systems, we developed an automated high-throughput multi-modal  
249 microscope capable of multi-position and multi-timepoint fluorescence imaging and point  
250 scanning Raman microscopy (**Extended Data Fig. 1**). A 749 nm short-pass filter was placed to  
251 separate brightfield and fluorescence from Raman scattering signal, and the fluorescence and  
252 Raman imaging modes were switched by swapping dichroic filters with auto-turrets. To realize a  
253 high-throughput Raman measurement, galvo mirror-based point scanning and stage scanning was  
254 combined to acquire each FOV and multiple different FOVs, respectively.

255 To realize this in an automated fashion, a MATLAB (2020b) script that communicates with Micro-  
256 manager<sup>28</sup>, a digital acquisition (DAQ) board, and Raman scattering detector (Princeton  
257 Instruments, PIXIS 100BR eXcelon) was written (**Extended Data Fig. 2**). A 2D point scan Raman  
258 imaging sequence was regarded as a dummy image acquisition in Micro-manager, during which  
259 the script communicated via the DAQ board with 1. the detector to read out a spectrum, 2. the  
260 mirror to update the mirror angles, and 3. shutters to control laser exposure. All communications  
261 were realized using transistor-transistor logic (TTL) signaling. Updating of the galvo mirror angles  
262 was conducted during the readout of the detector. While the script ran in the background, Micro-



263 manager initiated a multi-dimensional acquisition consisting of brightfield, DAPI, GFP, and  
264 dummy Raman channel at multiple positions and z-stacks.

265 An Olympus IX83 fluorescence microscope body was integrated with a 785 nm Raman excitation  
266 laser coupled to the backport, where the short-pass filter deflected the excitation to the sample  
267 through an Olympus UPLSAPO 60X NA 1.2 water immersion objective. The backscattered light  
268 was collimated through the same objective and collected with a 50  $\mu\text{m}$  core multi-mode fiber,  
269 which was then sent to the spectrograph (Holospec f/1.8i 785 nm model) and detector. The  
270 fluorescence and brightfield channels were imaged by the Orca Flash 4.0 v2 sCMOS camera from  
271 Hamamatsu Photonics. The exposure time for each point in the Raman measurement was 20 msec,  
272 and laser power at the sample plane was 212 mW. Each FOV was 100x100 pixels, with each pixel  
273 corresponding to about 1  $\mu\text{m}$ . The laser source was a 785 nm Ti-Sapphire laser cavity coupled to  
274 a 532 nm pump laser operating at 4.7W.

275 The time to acquire Raman hyperspectral images was roughly 8 minutes per FOV. With 8 minutes,  
276 it is unrealistic to image an entire glass-bottom plate. Therefore, we visually chose representative  
277 FOVs that cover all representative cell types including iPSC-like, epithelial-like, stromal-like and  
278 MET cells. 20 FOVs were chosen for each plate, where roughly 15 FOVs were from the boundaries  
279 of colonies, five from non-colonies, and one from non-cells to use for background correction.

280 Due to the extended Raman imaging time, evaporation of the immersion water was no longer  
281 negligible. Therefore, we developed an automated water immersion feeder using syringe pumps  
282 and syringe needles glued to the tip of the objective lens. Here, water was supplied at a flow rate  
283 of 1  $\mu\text{L}/\text{min}$ .

## 284 **iPSC and MEF mixture experiment**

285 Low passage iPSCs were first cultured in N2B27 2i media containing 3 mM CHIR99021, 1 mM  
286 PD0325901, and LIF. On the day of the experiment, 750,000 iPSCs and 750,000 MEFs were plated  
287 on the same gelatin-coated 3.5cm quartz glass-bottom Petri dish. Cells were plated in the same  
288 reprogramming medium as previously described (with Dox) with the exception of utilizing DMEM  
289 without phenol red (Gibco) instead of KnockOut DMEM. 6 hours after plating, the quartz dishes  
290 were taken for Raman imaging and fixed with 4% formaldehyde immediately after for HCR.

## 291 **Anchor gene selection by Waddington-OT**

292 To select anchor genes for connecting spatial information to the full transcriptome data,  
293 Waddington-OT (WOT)<sup>3</sup>, a probabilistic time-lapse algorithm that can reconstruct developmental  
294 trajectories, was used. We applied WOT to mouse fibroblast reprogramming scRNA-seq data  
295 collected at matching time-points and culture condition (day 8-14.5 at ½ day intervals)<sup>3</sup>. For each  
296 cell fate, we calculated the transition probabilities of each cell and selected the top 10 percentile  
297 cells per time point (**Extended Data Fig. 6**). Based on this, we ran the *FindMarker* function in  
298 Seurat<sup>29</sup> to find genes differentially expressed in these cell subsets per time point. Through this  
299 approach, we chose two genes per cell type that are both found by Seurat and commonly used for  
300 these cell types (iPSCs: *Nanog*, *Utf1*; epithelial: *Krt7*, *Peg10*; stromal: *Bgn*, *Coll1a1*; MET and  
301 neural: *Fabp7*, *Nnat*), along with one gene that is an early marker of iPSCs, *Epcam*.

## 302 **smRNA-FISH by hybridization chain reaction (HCR)**

303 Fixed samples were prepared for imaging using the HCR v3.0 protocol for mammalian cells on a  
304 chambered slide, incubating at the amplification step for 45 minutes in the dark at room

305 temperature. Three probes with amplifiers conjugated to fluorophores Alexa Fluor 488, Alexa  
306 Fluor 546, and Alexa Fluor 647 were used. Samples were stained with DAPI prior to imaging.  
307 After imaging, probes were stripped from samples by washing samples once for 5 minutes in 80%  
308 formamide at room temperature and then incubating three times for 30 minutes in 80% formamide  
309 at 37°C. Samples were washed once more with 80% formamide, then once with PBS, and reprobed  
310 with another panel of probes for subsequent imaging.

### 311 **Image registration of Raman hyperspectral images and fluorescence/smFISH images**

312 Brightfield and fluorescence channels including DAPI and GFP, along with corresponding Raman  
313 images, were registered by using 5  $\mu\text{m}$  polystyrene beads deposited on quartz glass-bottom Petri  
314 dishes (SF-S-D12, Waken B Tech) for calibration. The brightfield and fluorescence images of the  
315 beads were then registered by the scale-invariant template matching algorithm of the OpenCV  
316 (<https://github.com/opencv/opencv>) *matchTemplate* function followed by manual correction.

317 For the registration of smFISH and Raman images, four marks inscribed under the glass-bottom  
318 Petri dishes were used as reference points (**Extended Data Fig. 4**). As the Petri dishes are  
319 temporarily removed from the Raman microscope after imaging to do smFISH measurements, the  
320 dishes cannot be placed back at the same exact location on the microscope. Therefore, the  
321 coordinates of these reference points were measured along with the different FOVs. When the  
322 dishes were placed again after smFISH measurements, the reference mark coordinates were  
323 measured, and an affine mapping was constructed to calculate the new FOV coordinates. Lastly,  
324 as smFISH consisted of 3 rounds of hybridization and imaging, the following steps were performed  
325 to register images across different rounds with a custom MATLAB script:

326 1. Maximum intensity projection of nuclei stain and RNA images

327 2. Automatic registration of round 1 images to rounds 2 and 3 based on nuclei stain images  
328 and MATLAB function *imregtform*. First, initial registration transformation functions were  
329 obtained with a similarity transformation model passing the ‘multimodal’ configuration.  
330 Then, those transformations were used as the initial conditions for an affine model-based  
331 registration with the *imregtform* function. Finally, this affine mapping transformation was  
332 applied to all the smFISH (RNA) images.

333 3. Use the protocol in (2) to register nuclei stain images obtained from the multimodal Raman  
334 microscope and the 1<sup>st</sup> round of images used for smFISH. Then, apply the transformation  
335 to the remaining 2<sup>nd</sup> and 3<sup>rd</sup> rounds.

336 4. Manually remove registration outliers in (3).

337 Fibroblast cells were mobile during the 2-class mixture experiment so that by the time Raman  
338 imaging finished, cells had moved far enough from their original position that the above semi-  
339 automated strategy could not be applied. Thus, we manually identified cells present in both nuclei  
340 stain images before and after the Raman imaging.

### 341 **Hyperspectral Raman image processing**

342 Each raw Raman spectrum has 1,340 channels. Of those channels, we extracted the fingerprint  
343 region (600-1800  $\text{cm}^{-1}$ ), which resulted in a total of 930 channels per spectrum. Thus, each FOV  
344 is a 100x100x930 hyperspectral image. The hyperspectral images were then preprocessed by a  
345 python script as follows:

- 346 1. Cosmic ray removal. Cosmic rays were detected by subtracting the median filtered spectra  
347 from the raw spectra, and any feature above 5 was classified as an outlier and replaced with  
348 the median value. The kernel window size for the median filter was 7.
- 349 2. Autofluorescence removal. The *baseline* function in *rampy*  
350 (<https://github.com/charlesll/rampy>), a python package for Raman spectral preprocessing,  
351 was used with the alternating least squares algorithm '*als*'.
- 352 3. Savitzky-Golay smoothing. The *scipy.signal.savgol\_filter* function was used with window  
353 size 5 and polynomial order 3.
- 354 4. Averaging spectra at the single-cell level. Nuclei stain images were segmented using  
355 *NucleAIzer* (<https://github.com/spreka/biomagdsb>) and averaged pixel-level spectra that  
356 fall within each nucleus.
- 357 5. Spectra standardization. Spectra were standardized to a mean of 0 and a standard deviation  
358 of 1.

### 359 **Inferring anchor smFISH from Raman spectra or brightfield z-stacks**

360 For the two-class mixture and reprogramming experiment, we trained a decision tree-based non-  
361 linear regression, *Catboost*<sup>15</sup>, to predict the 'on' or 'off' expression states for each anchor gene  
362 from Raman spectra. We used 80% of the data as training and the remaining 20% as test data. The  
363 early stopping parameter was set to 5.

364 For the brightfield z-stack to smFISH inference, we applied deep learning to the whole image level.  
365 We trained a modified U-net with skip connections and residual blocks to estimate the  
366 corresponding smFISH image<sup>17</sup>. Due to the small size of the available training dataset, we  
367 augmented the data by rotation and flipping. Furthermore, a subsample of each brightfield image

368 was taken due to memory constraints (50x50 pixel region). Training was carried out on an NVIDIA  
369 Tesla P100 GPU, the number of epochs was 100, the learning rate was 0.01, and the batch size  
370 was 400. For each smFISH prediction, we chose the epoch that gave the best validation score.

### 371 **Inferring expression profiles from Raman images**

372 To infer expression profiles from Raman images, we used Tangram<sup>16</sup>. Tangram enables the  
373 alignment of spatial measurements of a small number of genes to scRNA-seq measurements. After  
374 using Catboost to infer anchor expression levels from Raman profiles, we aligned the inferred  
375 expression levels to scRNA-seq profiles using the *map\_cells\_to\_space* function  
376 (learning\_rate=0.1, num\_epochs=1000) on an Nvidia Tesla P100 GPU, followed by the  
377 *project\_genes* function in Tangram.

378 When comparing different pseudo-bulk transcriptome predictions with the real scRNA-seq data,  
379 we first transferred labels of annotated scRNA-seq profiles to the ground truth smFISH profiles  
380 using Tangram's label transfer function *project\_cell\_annotations*. Then, the average expression  
381 profiles across cells of a cell type were calculated by referring to the transferred labels and  
382 compared with those from the real scRNA-seq data<sup>3</sup>.

### 383 **Dimensionality reduction, embedding and projection**

384 For dimension reduction and visualization of Raman and scRNA-seq profiles, we performed  
385 forced layout embedding (FLE) using the *Pegasus* pipeline (<https://github.com/klarman-cell-observatory/pegasus>). First, we performed principal component analysis on both Raman and  
386 scRNA-seq profiles independently, calculated diffusion maps on the top 100 principal  
387 components, and performed an approximated FLE graph using Deep Learning by *pegasus.net\_fle*  
388 with default parameters.  
389

390 To project Raman profiles to a scRNA-seq embedding, we calculated a k-nearest neighbor graph  
391 ( $k$ -NN,  $k=15$ ) on the scRNA-seq top 50 principal components with the cosine metric, and UMAP  
392 with the *scanpy.tl.umap* function in Scanpy<sup>30</sup> version 1.7.2 with default parameters. Then, the  
393 Raman predicted expression profiles were projected on to the scRNA-seq UMAP embedding by  
394 *scanpy.tl.ingest* using k-NN as the labeling method and default parameters.

### 395 **Feature importance analysis**

396 To evaluate the contributions of Raman spectral features to expression profile prediction, we used  
397 the *get\_feature\_importance* function in Catboost with default parameters. As the dimensions of  
398 Raman spectra were reduced by PCA prior to Catboost, feature importance scores were calculated  
399 for each principal component, and the weighted linear combination of the Raman PCA eigen  
400 vectors with feature scores as the weight were calculated to obtain the full spectrum.

### 401 **Author contributions**

402 KJKK, JS, TB and AR conceived the research and developed the methodology. JS, TB and AR  
403 funded and supervised research. KJKK, JS, JO performed reprogramming experiments. KJKK  
404 developed the multi-modal Raman microscope and control software with supervision from JWK  
405 and PS. KJKK, EG, and KZ performed smFISH. KJKK, SG, TJS, and TB developed the Raman  
406 spectral preprocessing and classification pipeline. KJKK developed the image registration  
407 pipeline, and performed Waddington-OT, Tangram and feature importance analysis. KJKK and  
408 BG performed U-net. KJKK, JS, and AR wrote the manuscript with input from all the authors.

409 **Competing interests statement**

410 AR is a co-founder and equity holder of Celsius Therapeutics, an equity holder in Immunitas, and  
411 was a scientific advisory board member of ThermoFisher Scientific, Syros Pharmaceuticals,  
412 Neogene Therapeutics and Asimov until 31 July 2020. AR, TB, and SG are employees of  
413 Genentech from August 1, 2020, respectively. A patent application has been filed related to this  
414 work.

415 **Acknowledgements**

416 KJKK was supported by the Japan Society for the Promotion of Science Postdoctoral Fellowship  
417 for Overseas Researchers, and the Naito Foundation Overseas Postdoctoral Fellowship. BG was  
418 supported by the MathWorks Fellowship. JS was supported by the Helen Hay Whitney Foundation  
419 and NIH Pathway to Independence Award (1K99HD096049-01, 5K99HD096049-02,  
420 4R00HD096049-03), and funds from the Broad Institute of MIT and Harvard and Massachusetts  
421 General Hospital. This research was funded by NIH National Institute of Biomedical Imaging and  
422 Bioengineering, grant P41EB015871 (JWK, PS), NIH grant U19 MH114821 (TB), HubMap  
423 UH3CA246632 (TB), and HHMI and the Klarman Cell Observatory (AR). AR was a Howard  
424 Hughes Medical Institute Investigator when this work was initiated. We thank Eric Lander, Rudolf  
425 Jaenisch, Doeke Hekstra, Joseph Kirschvink for their helpful discussion and insights. We thank  
426 Leslie Gaffney for creating and editing figures.

427



## 428 **References**

- 429 1. Tanay, A. & Regev, A. Scaling single-cell genomics from phenomenology to mechanism. *Nature*  
430 **541**, 331–338 (2017).
- 431 2. Trapnell, C. *et al.* The dynamics and regulators of cell fate decisions are revealed by  
432 pseudotemporal ordering of single cells. *Nat. Biotechnol.* **32**, 381–386 (2014).
- 433 3. Schiebinger, G. *et al.* Optimal-Transport Analysis of Single-Cell Gene Expression Identifies  
434 Developmental Trajectories in Reprogramming. *Cell* **176**, 928-943.e22 (2019).
- 435 4. La Manno, G. *et al.* RNA velocity of single cells. *Nature* **560**, 494–498 (2018).
- 436 5. Bergen, V., Lange, M., Peidli, S., Wolf, F. A. & Theis, F. J. Generalizing RNA velocity to transient  
437 cell states through dynamical modeling. *Nat. Biotechnol.* **38**, 1408–1414 (2020).
- 438 6. Wagner, D. E. & Klein, A. M. Lineage tracing meets single-cell omics: opportunities and  
439 challenges. *Nat. Rev. Genet.* **21**, 410–427 (2020).
- 440 7. Wei, L. *et al.* Super-multiplex vibrational imaging. *Nature* **544**, 465–470 (2017).
- 441 8. Kobayashi-Kirschvink, K. J. *et al.* Linear Regression Links Transcriptomic Data and Cellular  
442 Raman Spectra. *Cell Systems* vol. 7 104-117.e4 (2018).
- 443 9. Singh, S. P. *et al.* Label-free characterization of ultra violet-radiation-induced changes in skin  
444 fibroblasts with Raman spectroscopy and quantitative phase microscopy. *Sci. Rep.* **7**, 10829 (2017).
- 445 10. Ichimura, T. *et al.* Visualizing cell state transition using Raman spectroscopy. *PLoS One* **9**, e84478  
446 (2014).
- 447 11. Ho, C.-S. *et al.* Rapid identification of pathogenic bacteria using Raman spectroscopy and deep  
448 learning. *Nat. Commun.* **10**, 4927 (2019).
- 449 12. Stadtfeld, M., Maherali, N., Borkent, M. & Hochedlinger, K. A reprogrammable mouse strain from  
450 gene-targeted embryonic stem cells. *Nat. Methods* **7**, 53–55 (2010).
- 451 13. Choi, H. M. T. *et al.* Third-generation in situ hybridization chain reaction: multiplexed, quantitative,  
452 sensitive, versatile, robust. *Development* **145**, (2018).

- 453 14. McInnes, L., Healy, J., Saul, N. & Großberger, L. UMAP: Uniform Manifold Approximation and  
454 Projection. *J. Open Source Softw.* **3**, 861 (2018).
- 455 15. Prokhorenkova, L., Gusev, G., Vorobev, A., Dorogush, A. V. & Gulin, A. CatBoost: unbiased  
456 boosting with categorical features.
- 457 16. Biancalani, T. *et al.* Deep learning and alignment of spatially resolved single-cell transcriptomes  
458 with Tangram. *Nat. Methods* **18**, 1352–1362 (2021).
- 459 17. He, K., Zhang, X., Ren, S. & Sun, J. Deep residual learning for image recognition. in *2016 IEEE*  
460 *Conference on Computer Vision and Pattern Recognition (CVPR)* (IEEE, 2016).  
461 doi:10.1109/cvpr.2016.90.
- 462 18. Germond, A., Panina, Y., Shiga, M., Niioka, H. & Watanabe, T. M. Following Embryonic Stem  
463 Cells, Their Differentiated Progeny, and Cell-State Changes During iPS Reprogramming by Raman  
464 Spectroscopy. *Anal. Chem.* **92**, 14915–14923 (2020).
- 465 19. Freudiger, C. W. *et al.* Label-free biomedical imaging with high sensitivity by stimulated Raman  
466 scattering microscopy. *Science* **322**, 1857–1861 (2008).
- 467 20. Bai, Y. *et al.* Ultrafast chemical imaging by widefield photothermal sensing of infrared absorption.  
468 *Sci Adv* **5**, eaav7127 (2019).
- 469 21. Tamamitsu, M., Toda, K., Horisaki, R. & Ideguchi, T. Quantitative phase imaging with molecular  
470 vibrational sensitivity. *Opt. Lett.* **44**, 3729–3732 (2019).
- 471 22. Cleary, B., Cong, L., Cheung, A., Lander, E. S. & Regev, A. Efficient Generation of Transcriptomic  
472 Profiles by Random Composite Measurements. *Cell* **171**, 1424-1436.e18 (2017).
- 473 23. Eng, C.-H. L. *et al.* Transcriptome-scale super-resolved imaging in tissues by RNA seqFISH. *Nature*  
474 **568**, 235–239 (2019).
- 475 24. Chen, K. H., Boettiger, A. N., Moffitt, J. R., Wang, S. & Zhuang, X. RNA imaging. Spatially  
476 resolved, highly multiplexed RNA profiling in single cells. *Science* **348**, aaa6090 (2015).
- 477 25. Wang, X. *et al.* Three-dimensional intact-tissue sequencing of single-cell transcriptional states.  
478 *Science* (2018) doi:10.1126/science.aat5691.

- 479 26. Alon, S. *et al.* Expansion sequencing: Spatially precise in situ transcriptomics in intact biological  
480 systems. *Science* **371**, (2021).
- 481 27. Yang, K. D. *et al.* Multi-domain translation between single-cell imaging and sequencing data using  
482 autoencoders. *Nat. Commun.* **12**, 31 (2021).
- 483 28. Edelstein, A., Amodaj, N., Hoover, K., Vale, R. & Stuurman, N. Computer control of microscopes  
484 using  $\mu$ Manager. *Curr. Protoc. Mol. Biol.* **Chapter 14**, Unit14.20 (2010).
- 485 29. Stuart, T. *et al.* Comprehensive Integration of Single-Cell Data. *Cell* **177**, 1888-1902.e21 (2019).
- 486 30. Wolf, F. A., Angerer, P. & Theis, F. J. SCANPY: large-scale single-cell gene expression data  
487 analysis. *Genome Biol.* **19**, 15 (2018).
- 488

489

### Live cell culture

Fig. 1

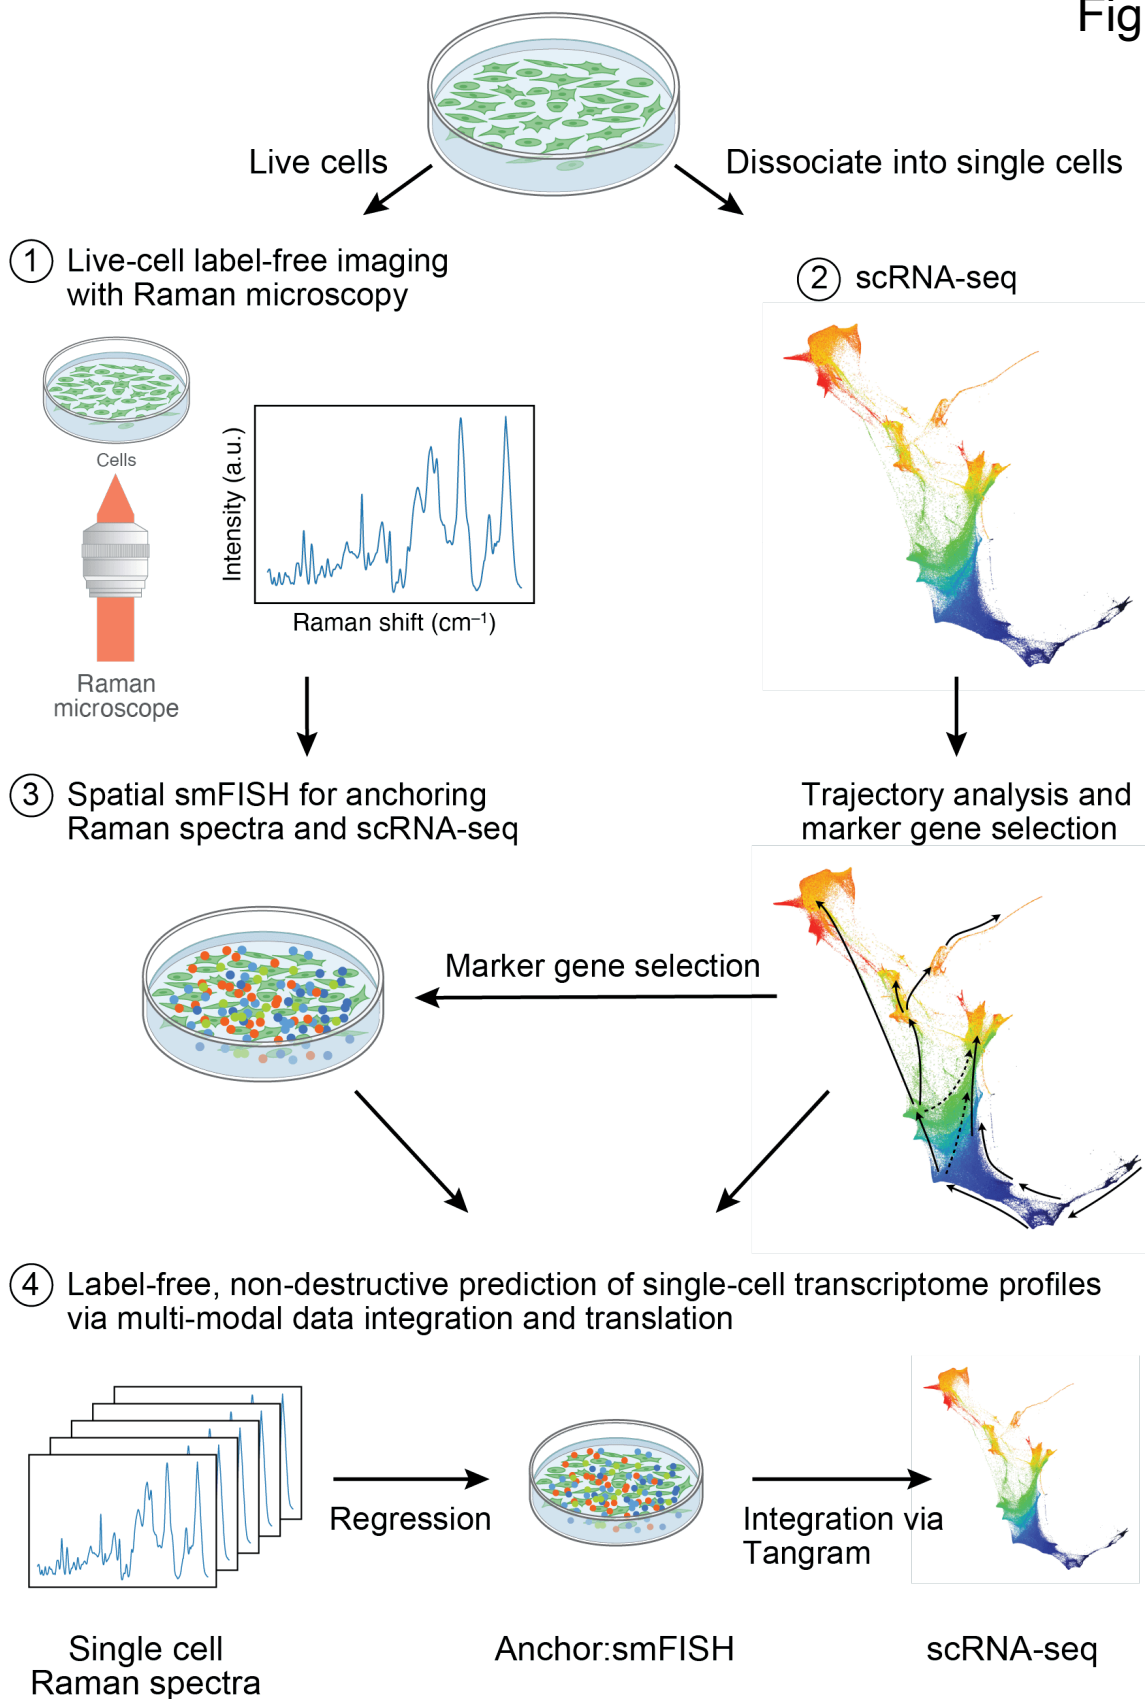

490 **Fig. 1 | Raman2RNA.** Live cells are cultured on gelatin-coated quartz glass-bottom plates (top) and  
491 Raman spectra are then measured at each pixel (at spatial sub-cellular resolution) within an image frame  
492 (1), followed by smFISH imaging in the same area (3). From parallel plates, cells are dissociated into a  
493 single cell suspension and profiled by scRNA-seq (2). scRNA-seq profiles are used to select 9 marker  
494 genes for 5 major cell clusters, and those are measured with spatial smFISH (3). Lastly, a regression  
495 model is trained (4) to predict anchor smFISH profiles from Raman spectra, followed by integration via  
496 Tangram<sup>16</sup> to predict whole single-cell transcriptome profiles from smFISH profiles.

Fig. 2

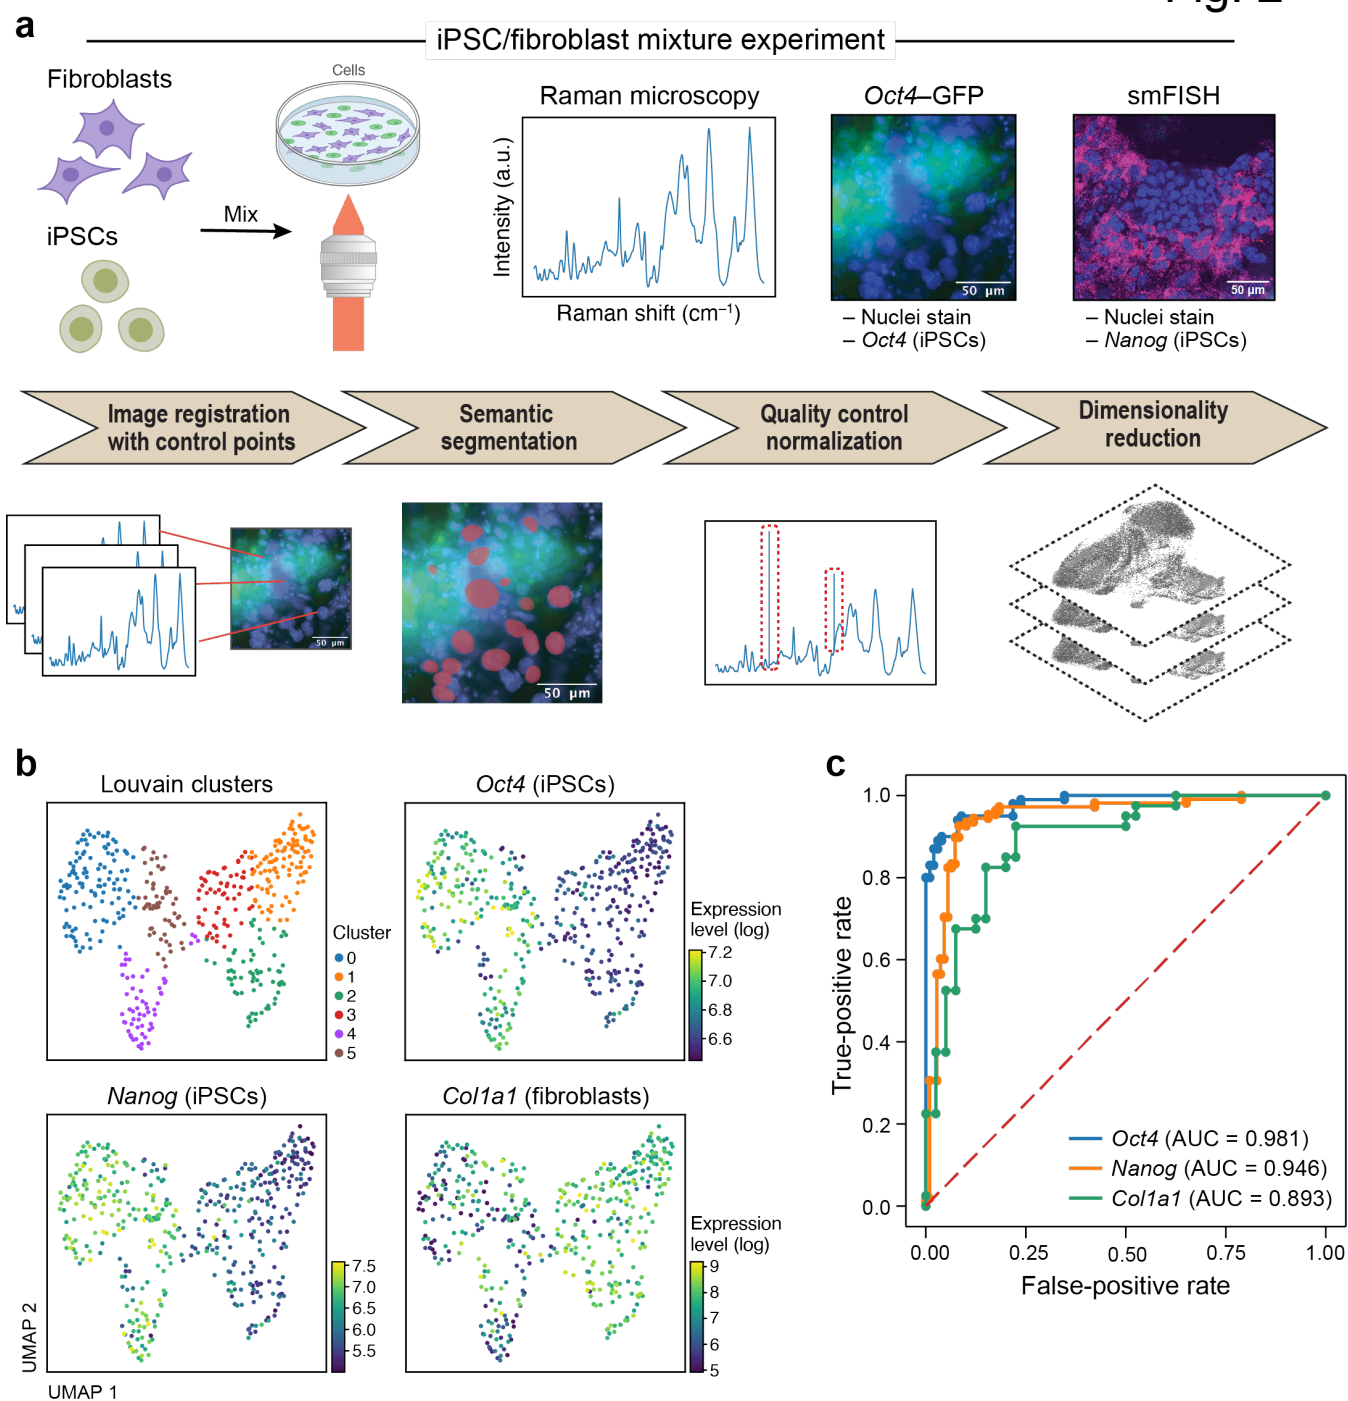

497

498 **Fig. 2 | Raman2RNA accurately distinguishes cell types and predicts binary expression of marker**

499 **genes in a mixture of mouse fibroblasts and iPSCs. a.** Overview. Top: Experimental procedures.

500 Mouse fibroblasts and iPSCs were mixed 1:1 and plated on glass-bottom plates, followed by Raman

501 imaging of live cells, nuclei staining and measurement of endogenous *Oct4*-GFP (iPSC marker) reporter)

502 by fluorescence imaging, and cell fixation and processing for smFISH with DAPI and probes for *Nanog*

503 (iPSCs, magenta) and *Coll1a1* (fibroblasts). Bottom: Preprocessing and analysis. From left: Image  
504 registration with control points (**Methods**), was followed by semantic cell segmentation, outlier  
505 removal/normalization and dimensionality reduction. **b.** Raman2RNA distinguishes cell states from  
506 Raman spectra. 2D UMAP embedding of single-cell Raman spectra (dots) colored by Louvain clustering  
507 labels (top left) or smFISH measured expression of *Oct4* (top right), *Nanog* (bottom left) and *Coll1a1*  
508 (bottom right). **c.** Raman2RNA accurately predicts binary (on/off) expression of marker genes. Receiver  
509 operating characteristic (ROC) plots and area under the curve (AUC) obtained by classifying the ‘on’ and  
510 ‘off’ states of *Oct4* (blue), *Nanog* (orange) and *Coll1a1* (green).



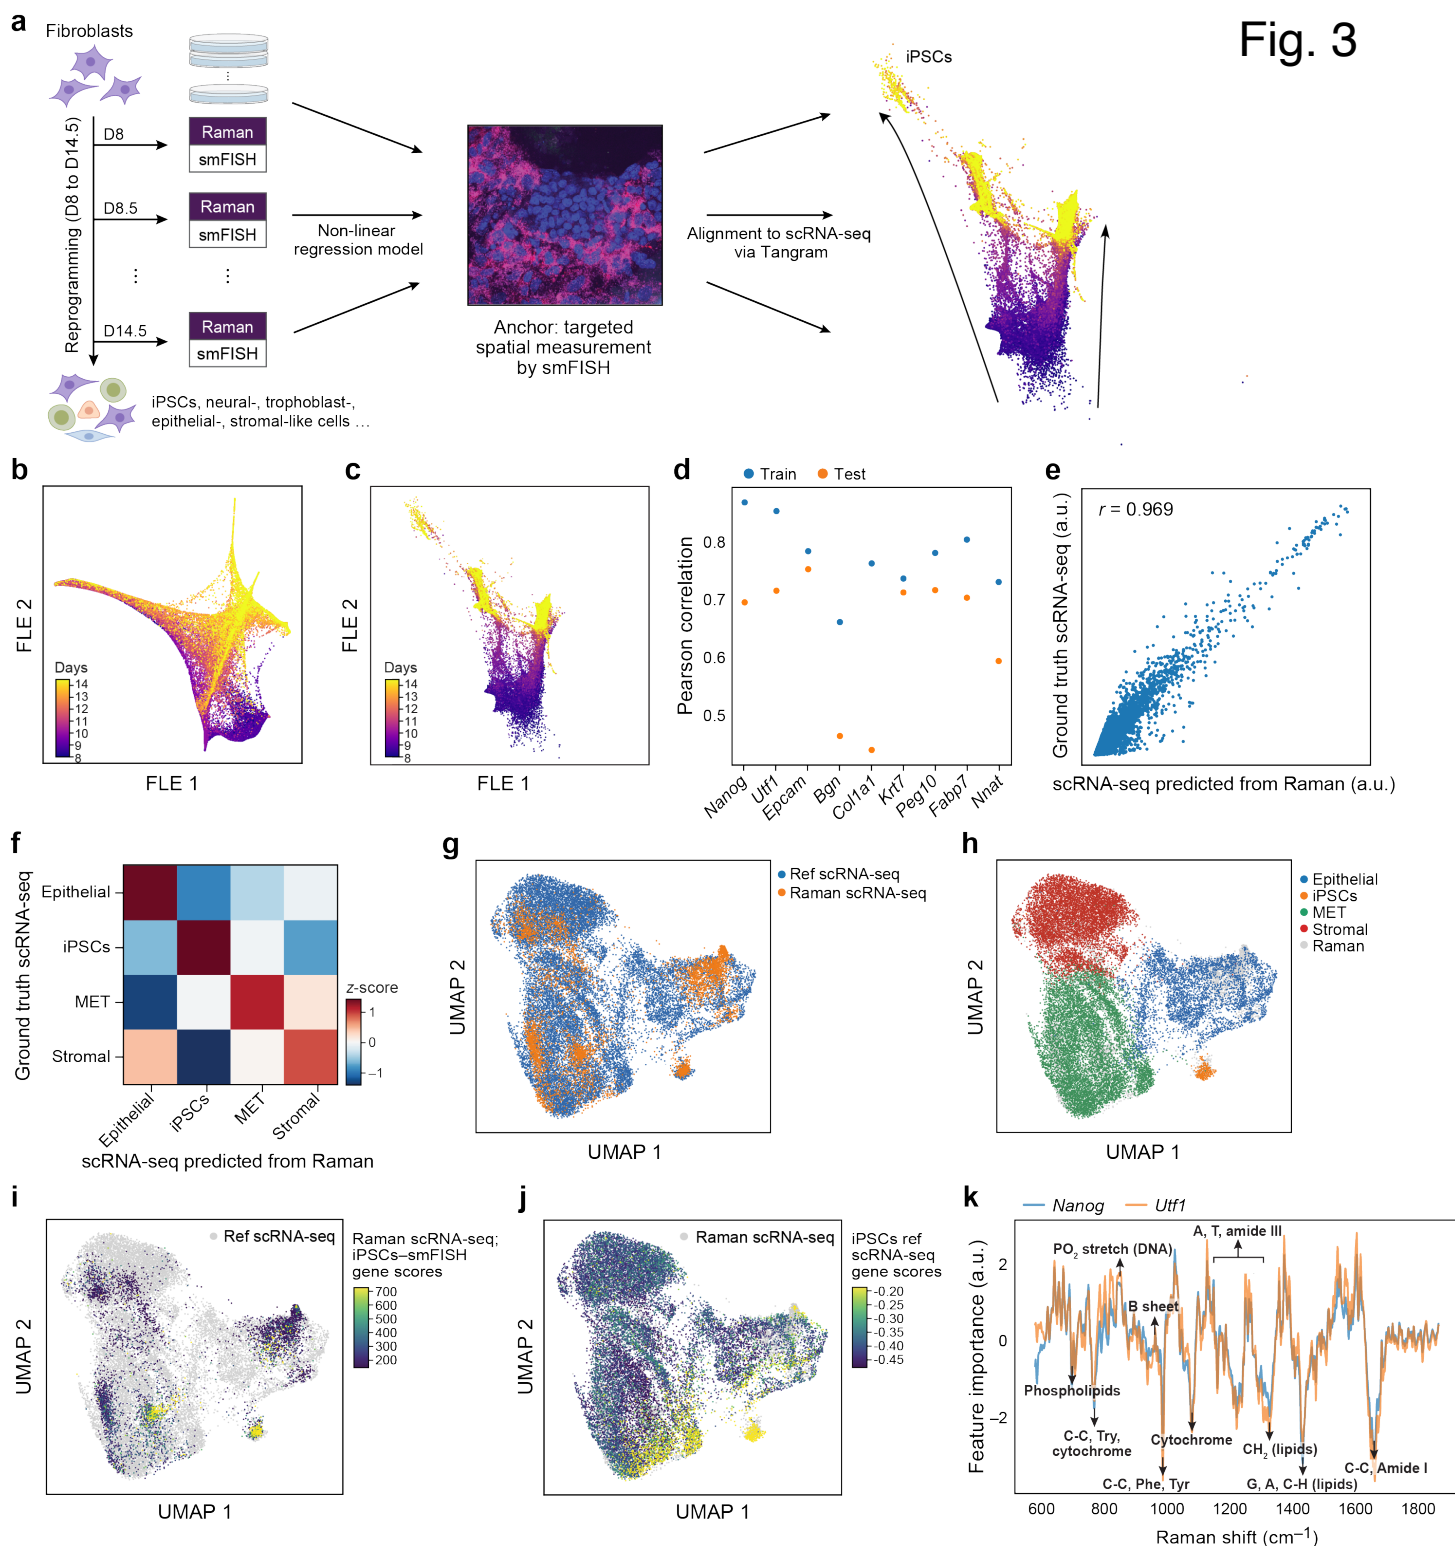

**Fig. 3**

511  
 512 **Fig. 3 | Raman2RNA predicts single-cell RNA profiles across cell types during reprogramming of**  
 513 **mouse fibroblasts to iPSCs. a.** Approach overview. From left: Mouse fibroblasts were reprogrammed



514 into induced pluripotent stem cells (iPSCs) over the course of 14.5 days ('D'), and, at half-day intervals  
515 from days 8 to 14.5, spatial Raman spectra, smFISH for nine anchor genes, and nuclei stain by  
516 fluorescence imaging were measured for each plate. Machine learning and multi-modal data integration  
517 methods (Catboost and Tangram) were used to predict single-cell RNA-seq profiles from Raman spectra  
518 using smFISH as anchor. **b,c.** Low dimensionality embedding of single-cell Raman spectra captures  
519 progress in reprogramming. Force-directed layout embedding (FLE) of Raman spectra (b, dots) or  
520 scRNA-seq (c, dots) colored by days of measurement (colorbar). **d.** Correct prediction of smFISH anchors  
521 from Raman spectra. Pearson correlation coefficient (*y* axis) between measured (smFISH) and Raman-  
522 predicted levels for each smFISH anchor (*x* axis) in leave-one-out cross-validation where 8 out of 9  
523 smFISH anchor genes were used for training, and the left-out gene was predicted. **e.f.** Raman2RNA  
524 accurately predicts pseudo-bulk expression profiles of major cell types. **e.** scRNA-seq measured (*y* axis)  
525 and R2R-predicted (*x* axis) for each gene (dot) in pseudo-bulk RNA profiles averaged across iPSCs. **f.**  
526 Pair-wise correlation (color bar) between Raman-predicted and scRNA-seq measured pseudo-bulk  
527 profiles in each cell types (rows, columns). **g-j.** Co-embedding highlights agreement between real and  
528 R2R inferred single cell profiles. UMAP co-embedding of Raman predicted RNA profiles and measured  
529 scRNA-seq profiles (dots) colored by data source (**g**, Raman predicted in orange; measured scRNA-seq in  
530 blue), cell type annotations (**h**) or by iPSC gene signature scores (calculated by averaging expression of  
531 genes *Nanog* and *Utf1*, and subtracting the average of a randomly selected set of reference genes;  
532 **Methods**) of Raman-predicted profiles (**i**) or of real scRNA-seq (**j**). **k.** Feature importance scores of  
533 Raman spectra in predicting expression profiles. Feature scores for iPSC related marker genes (*y* axis)  
534 along the Raman spectrum (*x* axis). Known Raman peaks<sup>18</sup> were annotated.  
535

536  
537  
538  
539  
540  
541  
542  
543  
544  
545  
546  
547  
548  
549  
550  
551  
552  
553  
554  
555  
556  
557  
558

## Supp. Fig. 1

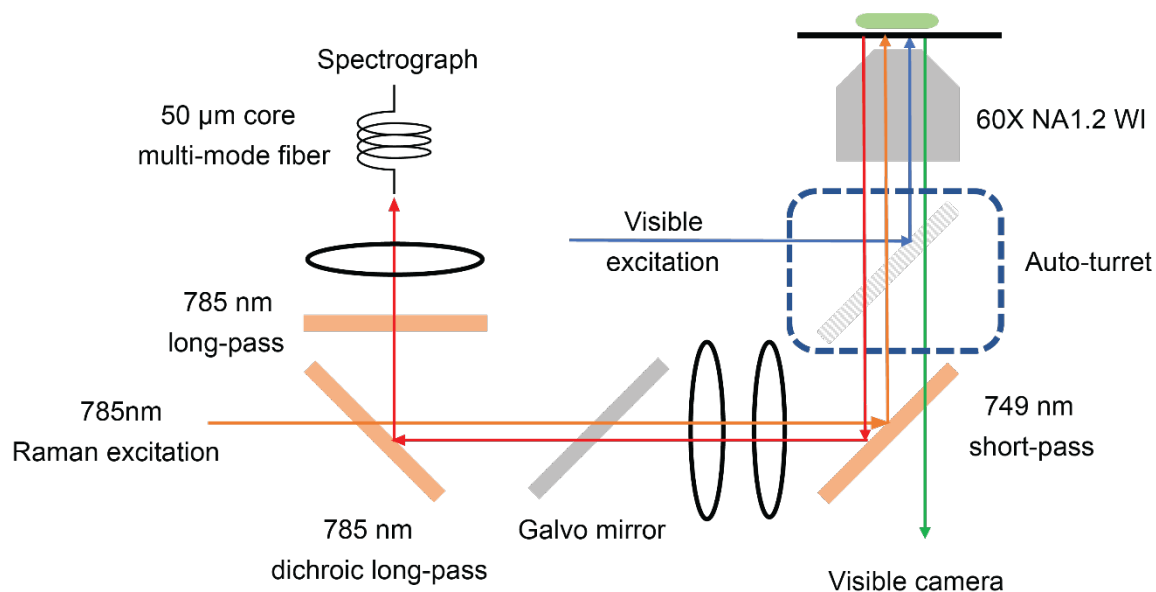

**Extended Data Fig. 1 | A multi-modal Raman microscope capable of fluorescence imaging and Raman microscopy.** Schematic of a Raman microscope integrated with a wide-field fluorescence microscope for simultaneous detection of nuclei staining, bright field, fluorescence channels, and Raman images.

559  
560  
561

## Supp. Fig. 2

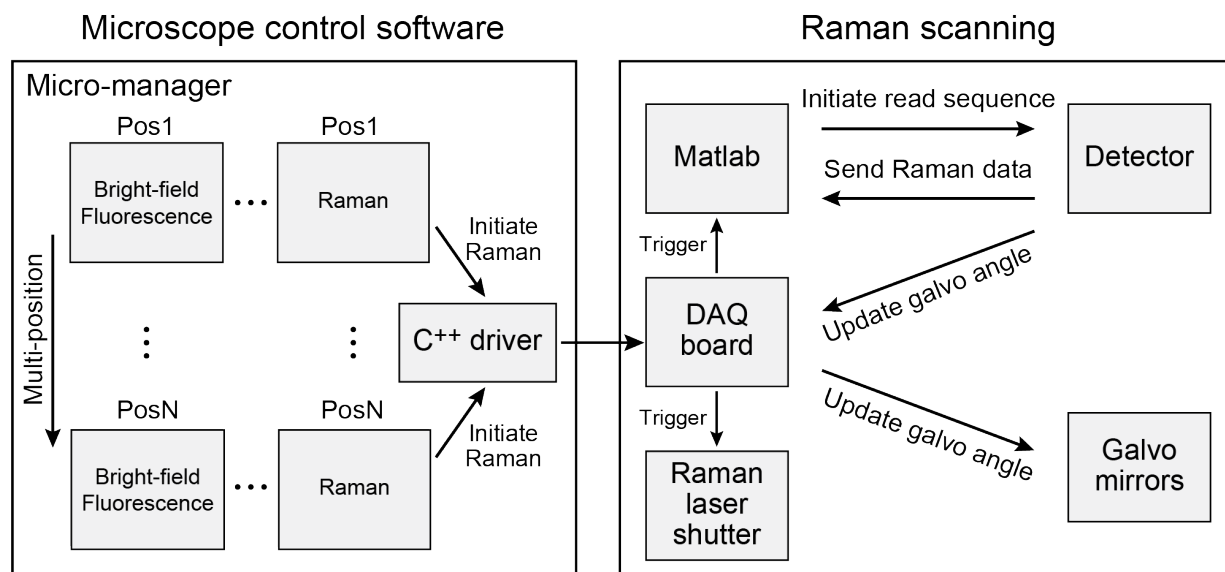

562

563 **Extended Data Fig. 2 | Overview of high-throughput Raman imaging software used in the study.** A  
564 general-purpose microscope control software Micro-manager and a custom MATLAB script were  
565 combined to enable automated multi-modal measurements. Under Micro-manager, a Raman channel was  
566 registered as a 'dummy' channel along with brightfield and fluorescence channels. Micro-manager was  
567 responsible for changing the field of view (FOV) and imaging modality. During the Raman sequence,  
568 Micro-manager communicated with a digital acquisition (DAQ) board, through which a transistor-to-  
569 transistor logic (TTL) signal was generated to initiate the scanning sequence. Upon detection of the TTL  
570 signal, the MATLAB script controlled the Raman detector, laser shutter, and updated the galvo mirror  
571 angles through the DAQ board.

572

573

574

575

576  
577  
578  
579  
580  
581  
582  
583  
584  
585  
586  
587  
588  
589  
590  
591  
592  
593  
594  
595

## Supp. Fig. 3

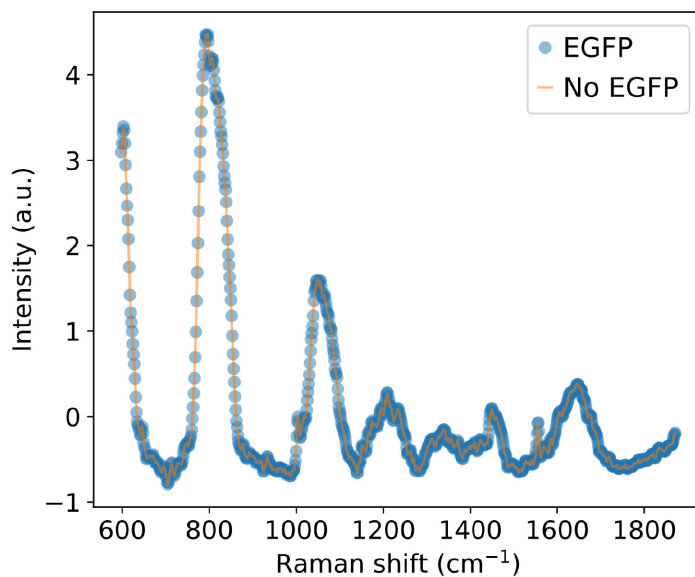

**Extended Data Fig. 3 | GFP does not interfere in Raman spectra measurement.** Raman spectra of culture media with (blue) and without (orange) GFP at physiological concentration.

596  
597  
598  
599  
600  
601  
602  
603  
604  
605  
606  
607  
608  
609  
610  
611  
612  
613  
614  
615  
616  
617  
618

## Supp. Fig. 4

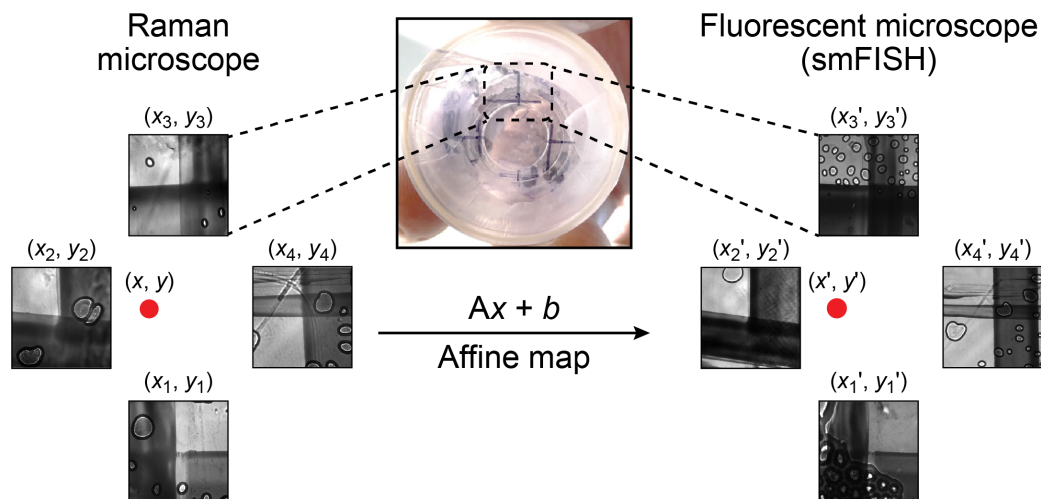

**Extended Data Fig. 4 | Image registration between the Raman and smFISH microscope using control points.** Control points were inscribed under petri dishes with permanent markers and the coordinates were measured prior to any data acquisition. After Raman measurement and smFISH processing, samples were placed back to the microscope and control point coordinates were remeasured. Then, affine mapping was used to update the FOV coordinates to locate the exact same cells.

619  
620  
621  
622

## Supp. Fig. 5

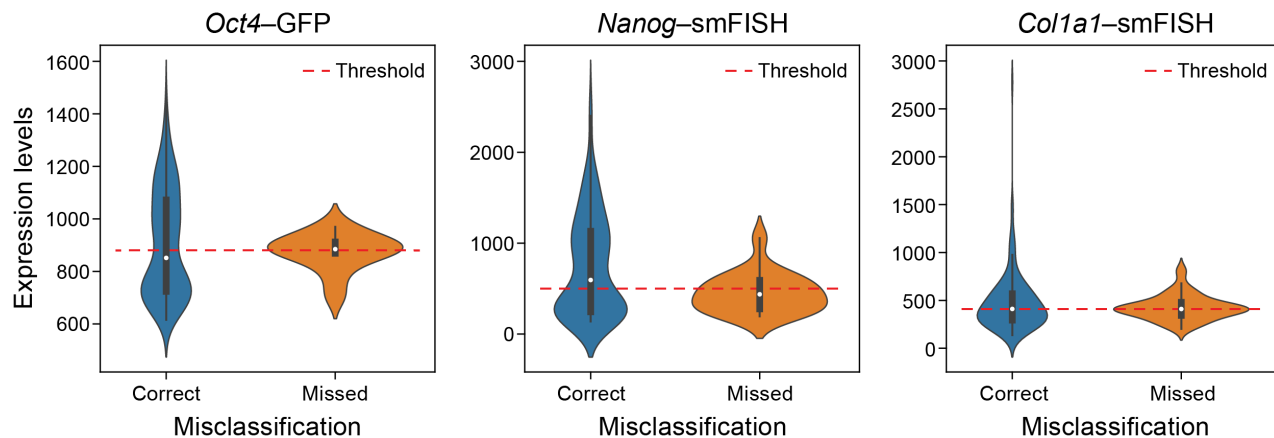

623  
624  
625  
626  
627  
628  
629  
630  
631

**Extended Data Fig. 5 | Misclassification of genes in the cell mixture classification experiment occurs when the ground truth smFISH is near the expression threshold.** Distribution of measured smFISH expression level (y axis) for cells correctly (blue) or incorrectly (orange) classified by their Raman spectra for the expression of that gene. Horizontal line: an example threshold used for the logistic regression classifier.

632  
633  
634  
635  
636

## Supp. Fig. 6

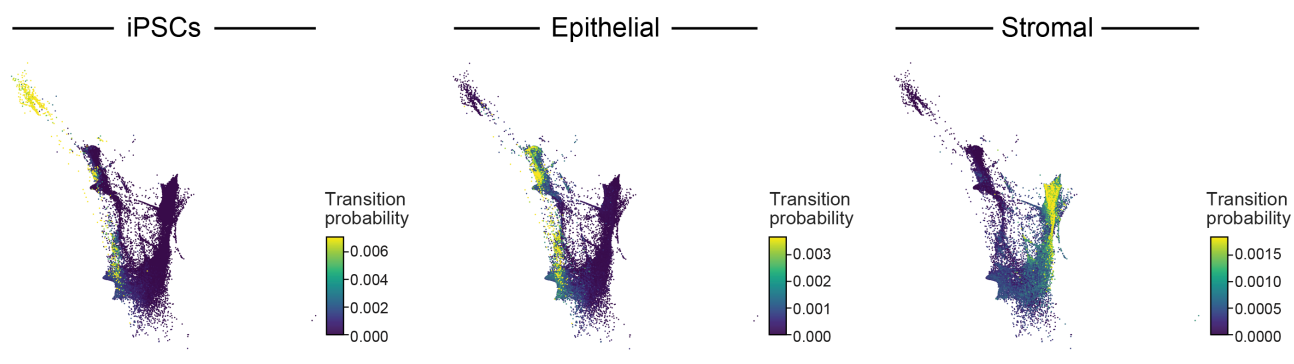

637  
638  
639  
640  
641  
642  
643  
644  
645

**Extended Data Fig. 6 | Cell transition probabilities inferred by Waddington-OT from scRNA-seq during reprogramming.** Force-directed layout embedding (FLE) of scRNA-seq profiles (dots) from days 8 to 14.5 of reprogramming (dots) colored by the transition probability of each cell as inferred by Waddington-OT to be an ancestor of iPSCs (left), epithelial cells (middle) or stromal cells (right) at day 14.5.

646  
647  
648  
649  
650  
651  
652  
653  
654  
655  
656  
657  
658  
659  
660  
661  
662  
663  
664  
665  
666  
667  
668  
669  
670  
671

## Supp. Fig. 7

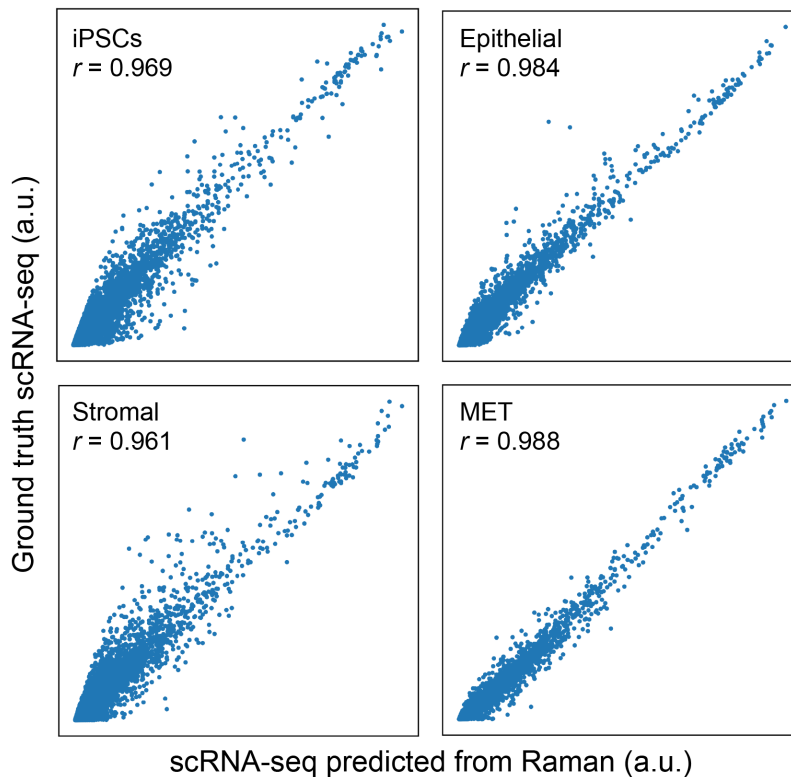

**Extended Data Fig. 7 | Raman-predicted and scRNA-seq measured pseudo-bulk profiles are well correlated across cell types.** ScRNA-seq measured (y axis) and R2R-predicted (x axis) expression for each gene (dot) in pseudo-bulk RNA profiles averaged across cells labeled as iPSC (top left), epithelial (top right), stromal (bottom left) and MET (bottom right). Pearson's r is denoted at the top left corner.



## Supp. Fig. 8

672  
673  
674

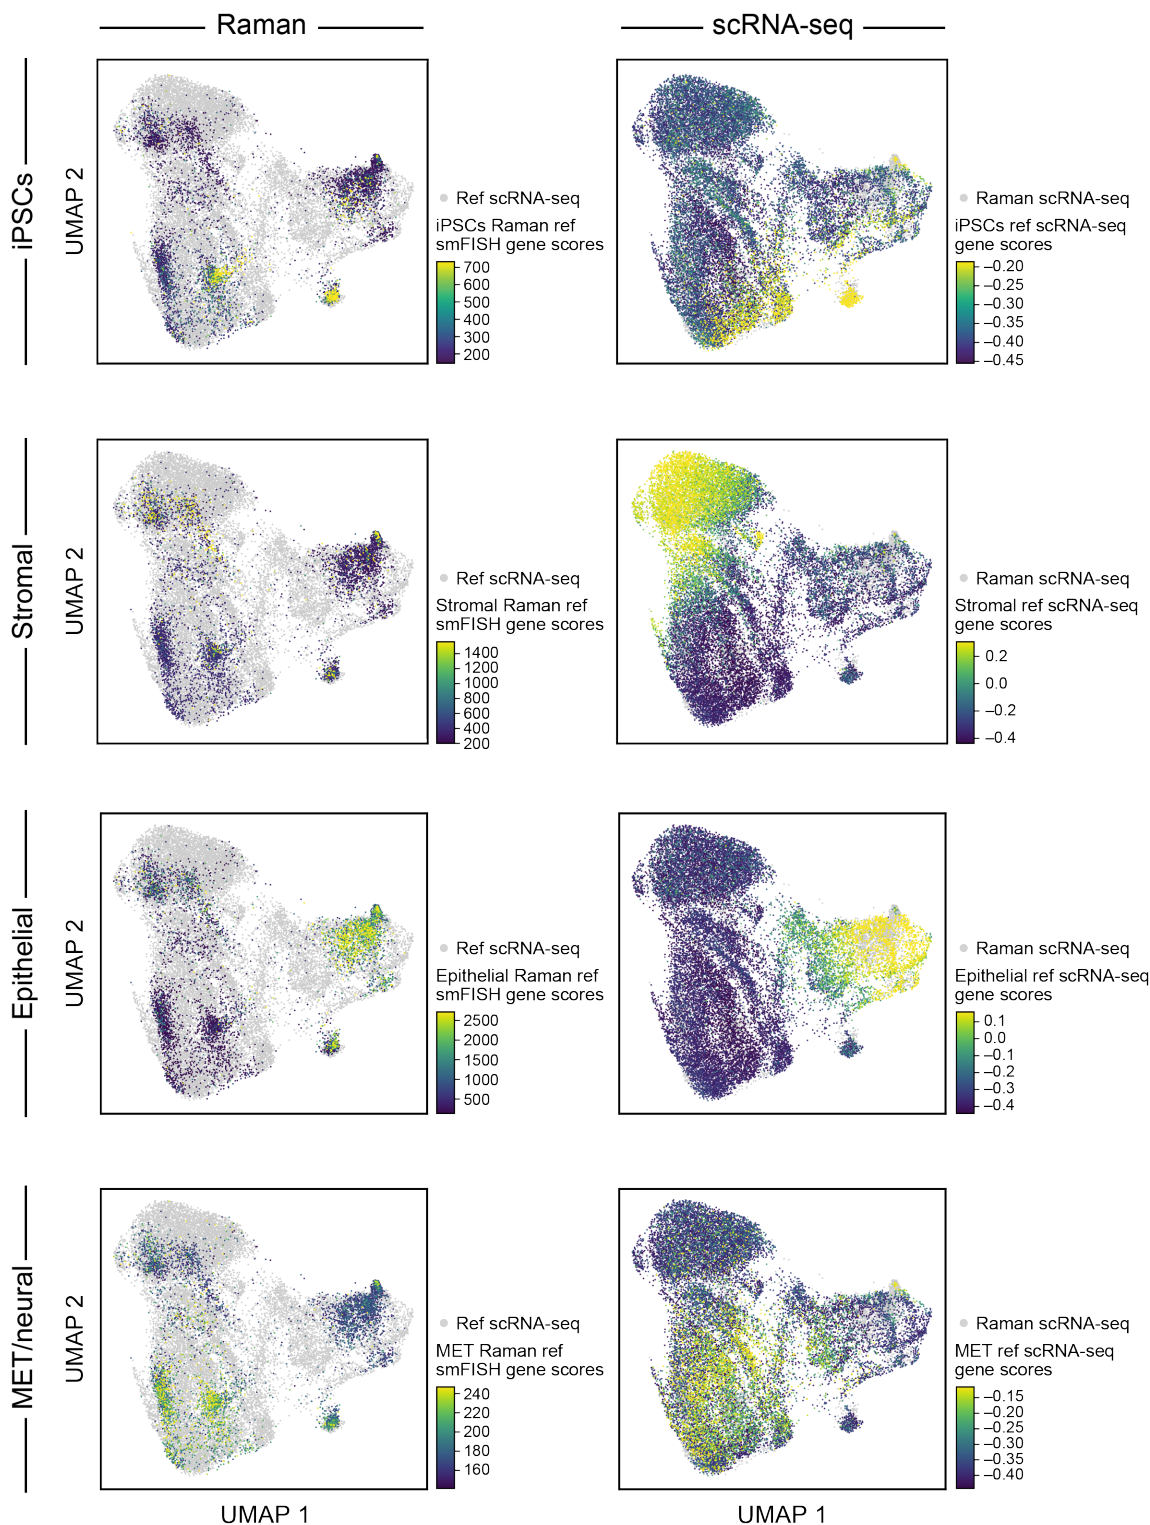

675 **Extended Data Fig. 8 | Measured and Raman-predicted single cell profiles co-embed well as**  
676 **reflected by gene scores for each cell type. UMAP co-embedding of Raman predicted RNA profiles and**  
677 **measured scRNA-seq profiles (dots) colored by scores of marker gene for different cell types (rows)**

678 determined by smFISH measurements (left, for cells with Raman-predicted profiles) or real scRNA-seq  
679 measurements (right, for cells with scRNA-seq profiles).

680  
681  
682

## Supp. Fig. 9

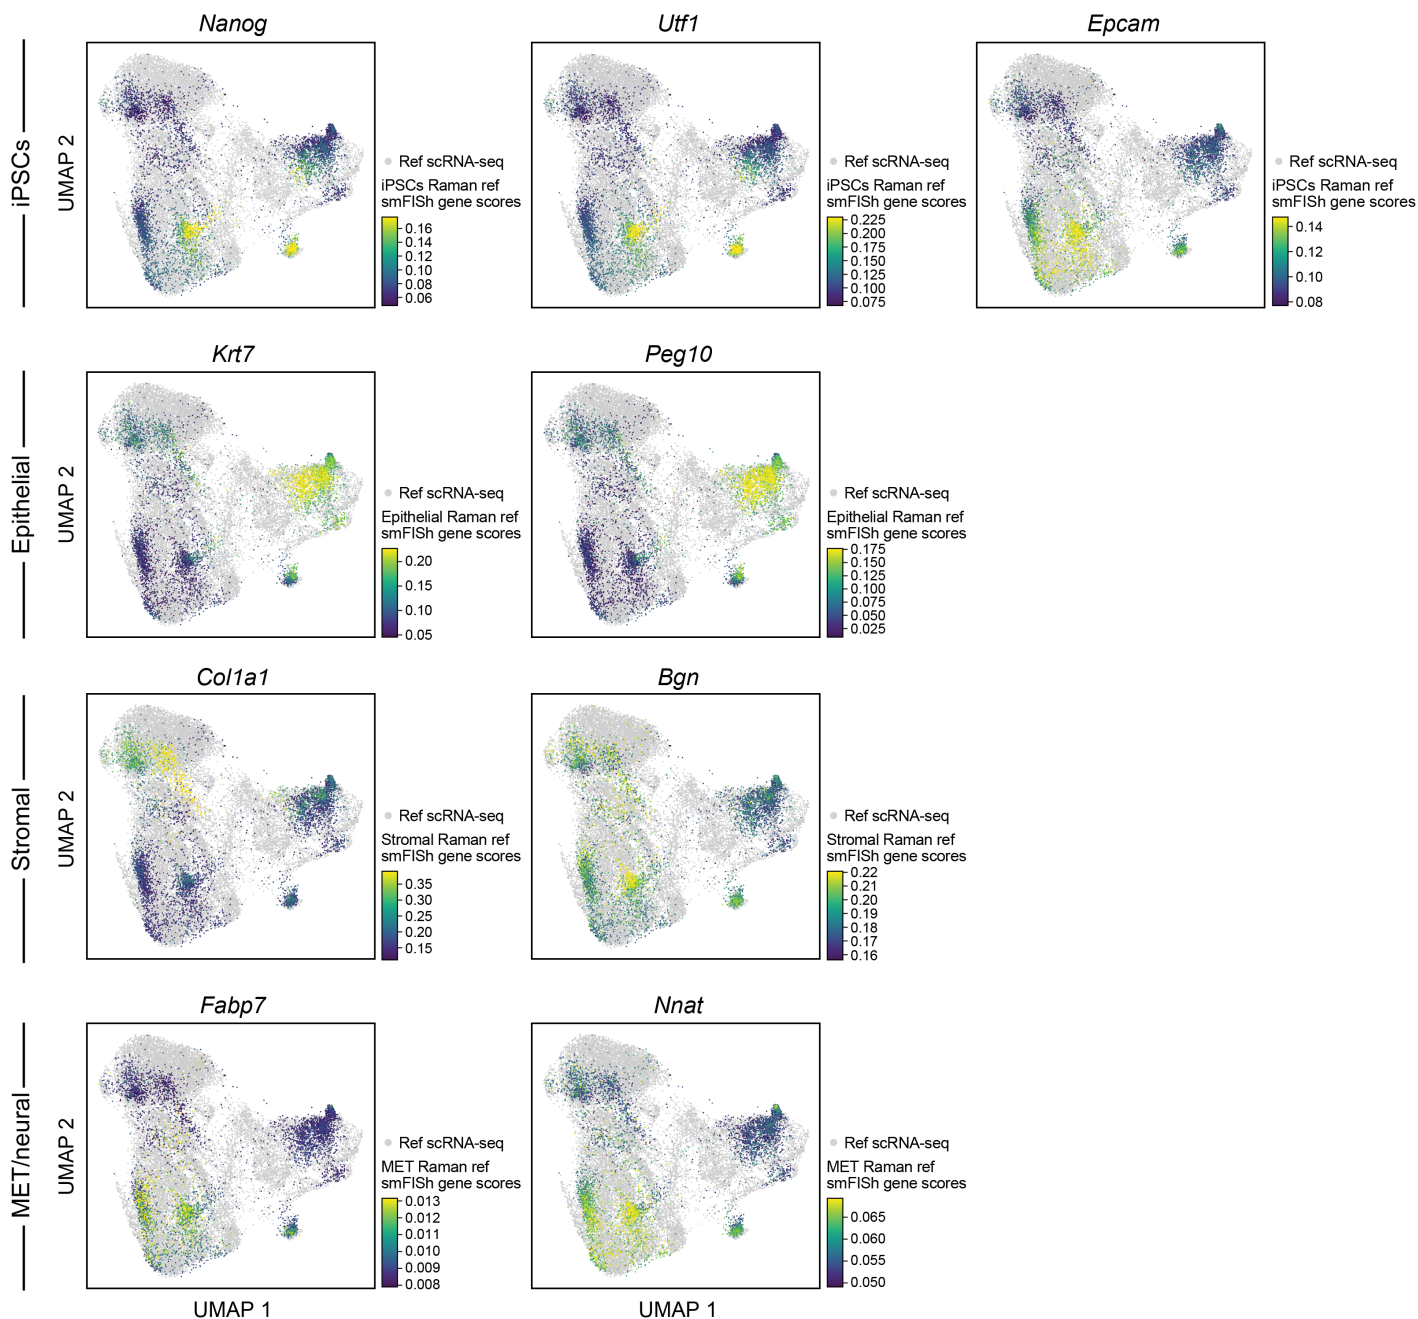

683 **Extended Data Fig. 9 | Measured and Raman-predicted single cell profiles co-embed well as**  
684 **reflected by smFISH measurement of Raman cells.** UMAP co-embedding of Raman predicted RNA  
685 profiles and measured scRNA-seq profiles (dots) where the Raman cells are colored by smFISH  
686 measurement of each of nine anchor genes.

687

688

## Supp. Fig. 10

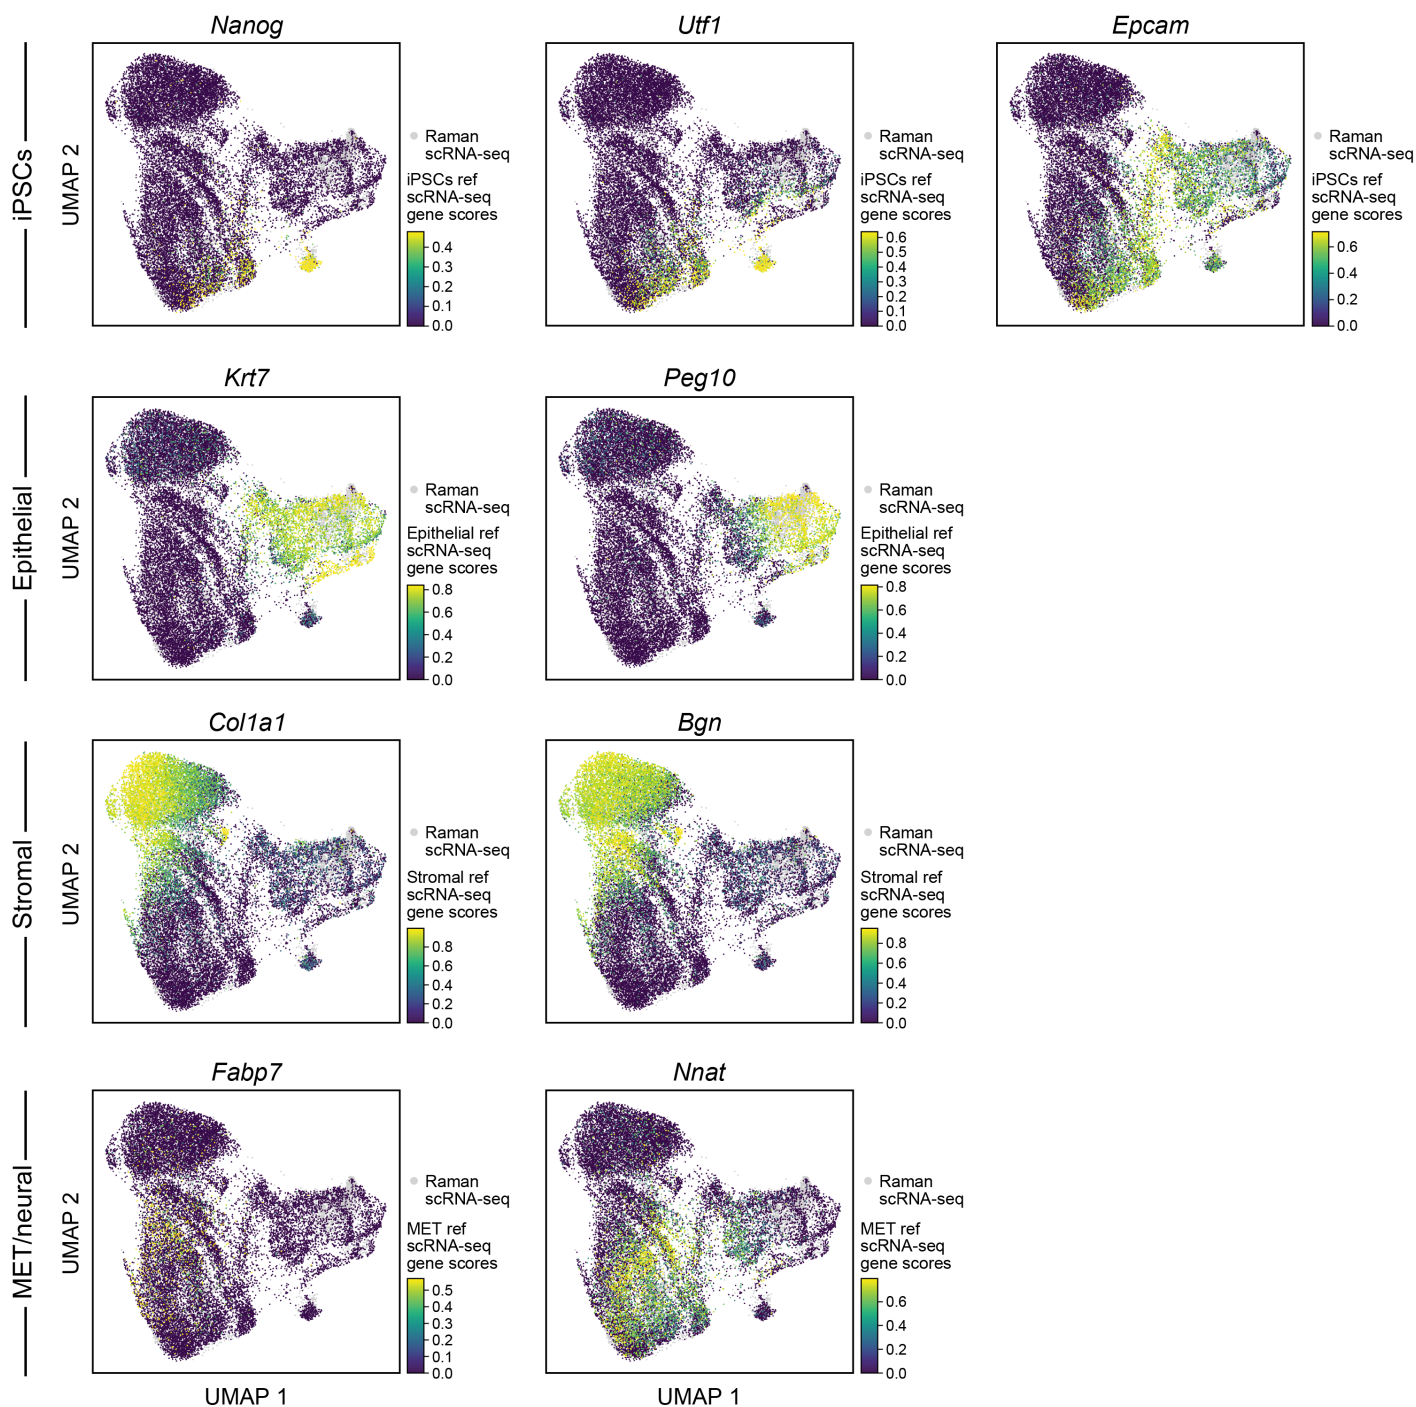

689 **Extended Data Fig. 10 | Measured and Raman-predicted single cell profiles co-embed well as**  
690 **reflected by scRNA-seq based expression of nine anchor genes. UMAP co-embedding of Raman**  
691 **predicted RNA profiles and measured scRNA-Seq profiles (dots) where the scRNA-seq profiled cells are**  
692 **colored by scRNA-seq measured expression of each of nine anchor genes.**



## Supp. Fig. 11

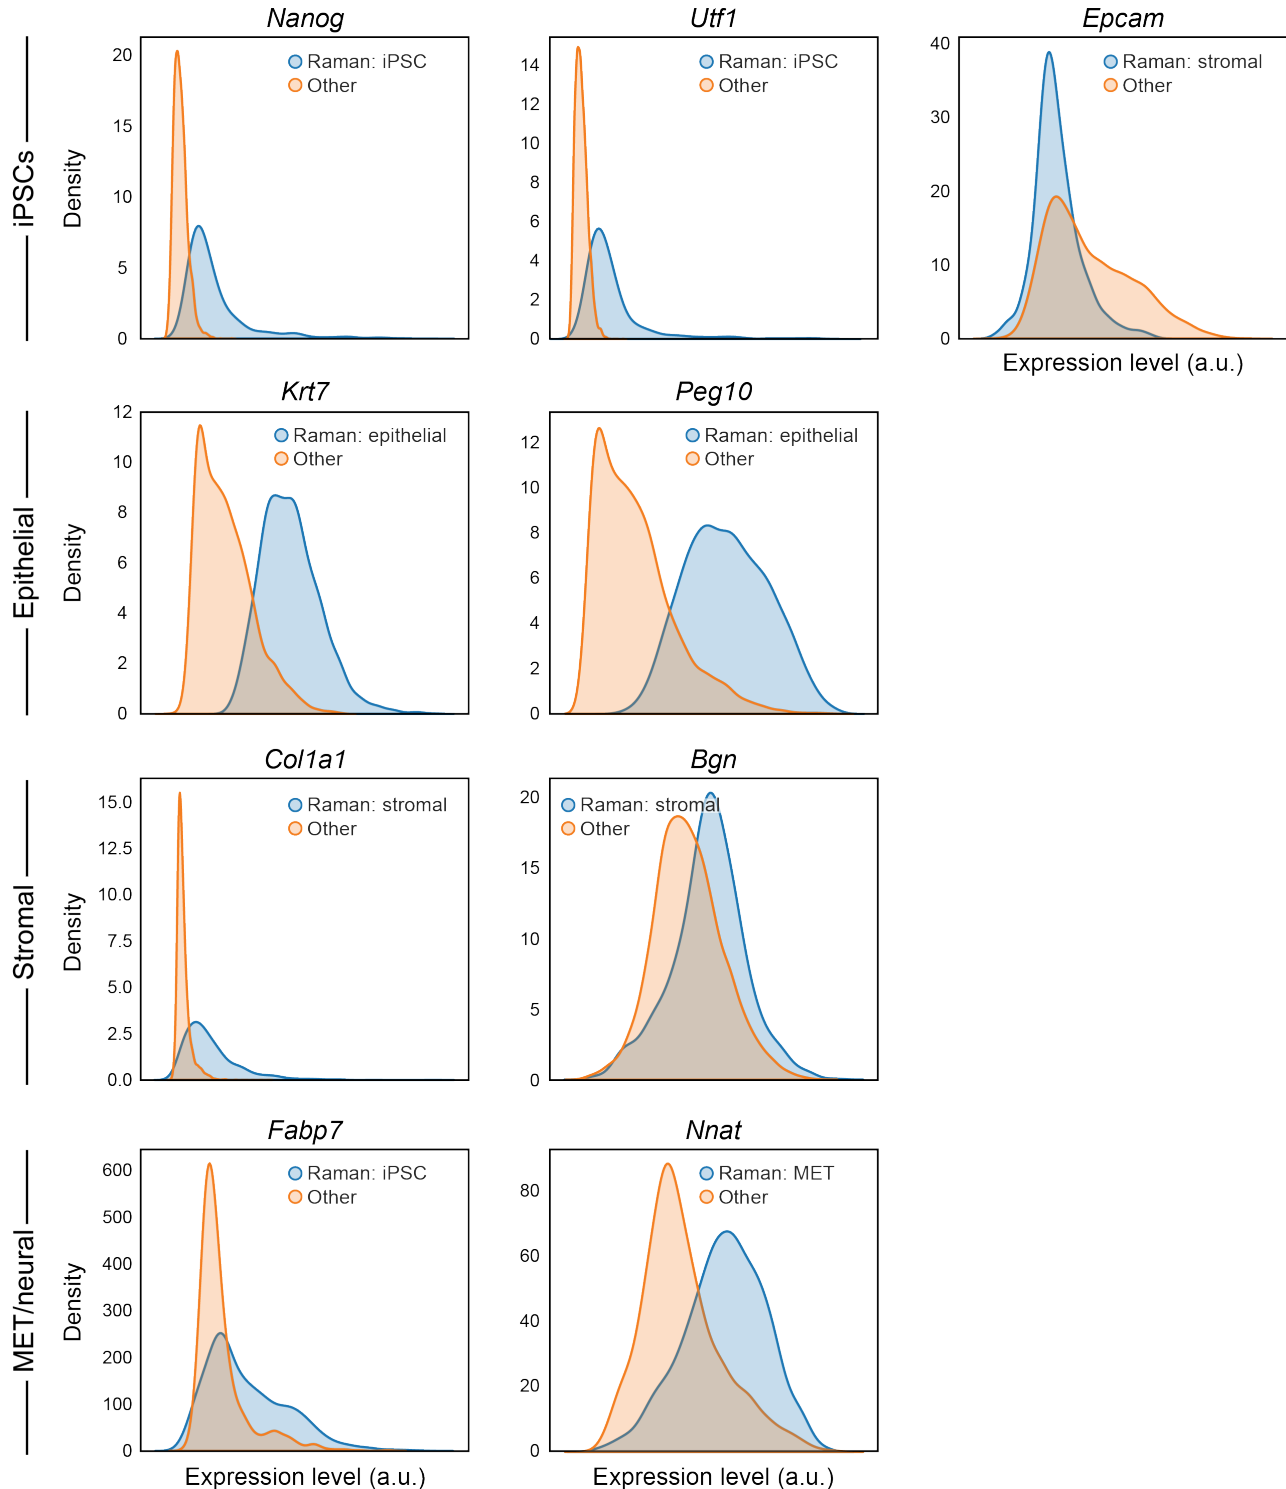

693 **Extended Data Fig. 11 | Distributions of expression of marker genes based on R2R-predicted**  
 694 **profiles.** Distributions (density plots) of the predicted expression in Raman2RNA inferred profiles for  
 695 each marker gene (panel) in its expected corresponding cell type (blue, based on the predicted expression  
 696 profiles) and all other cells (orange).

## Supp. Fig. 12

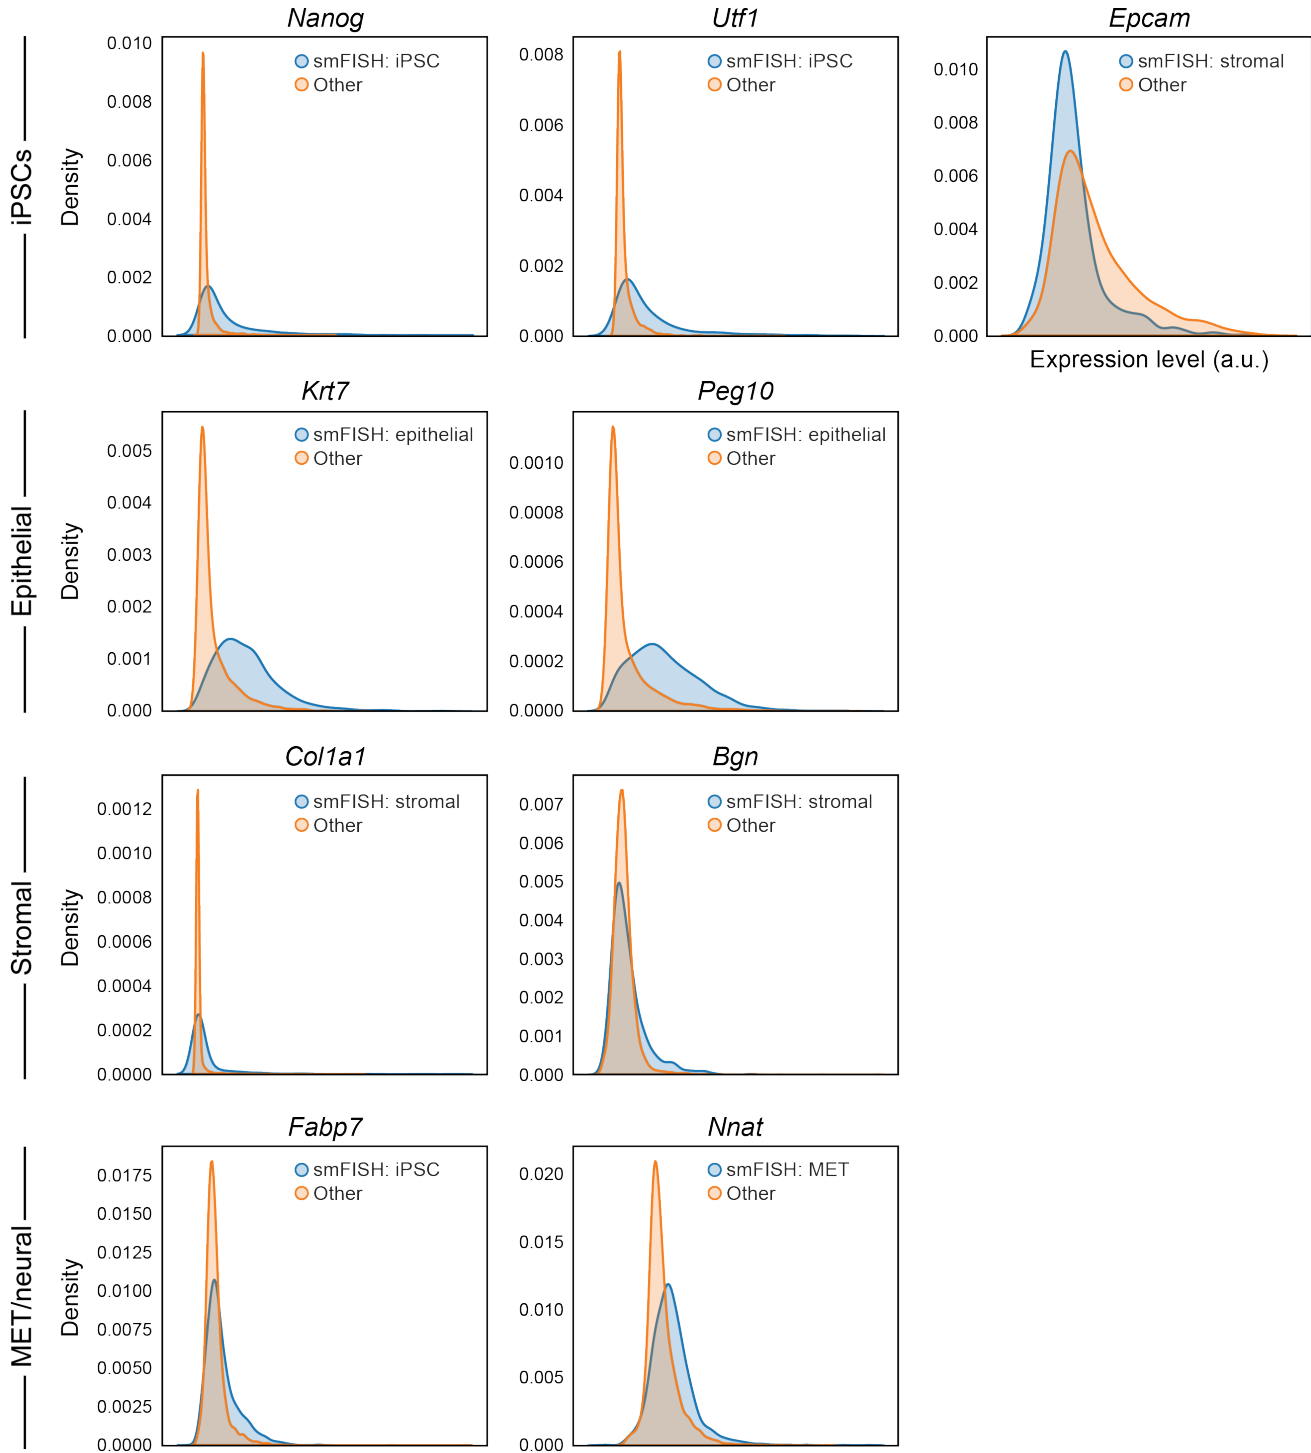

697

698 **Extended Data Fig. 12 | Distributions of expression of marker genes based on real smFISH profiles.**

699 Distributions (density plots) of the real smFISH profiles for each marker gene (panel) in its expected

700 corresponding cell type (blue, based on the R2R *predicted* expression profiles) and all other cells

701 (orange).

702

## Supp. Fig. 13

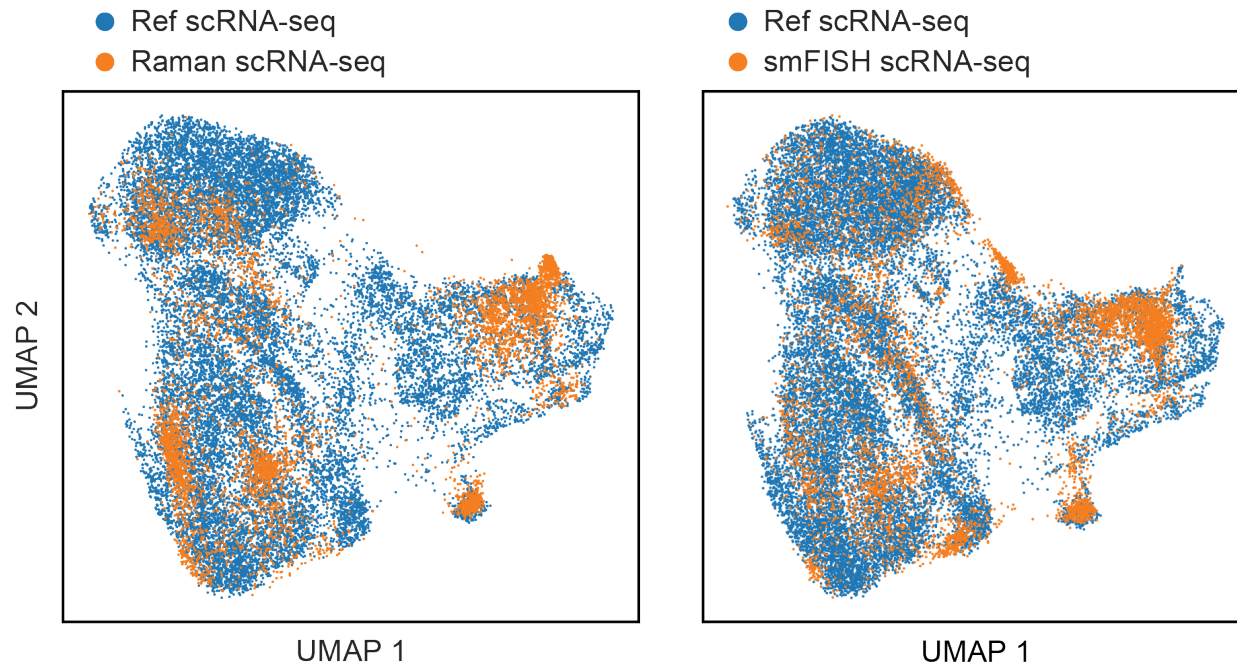

703

704

705 **Extended Data Fig. 13 | RNA profiles predicted directly from 9 anchor smFISH measurements lead**  
706 **to reduced variance compared to scRNA-seq.** UMAP co-embedding of cells from scRNA-seq (blue)  
707 and Raman (orange) experiments, with the latter based on either the Raman-predicted RNA profiles (left)  
708 or only smFISH-predicted RNA profiles (right).

709

710

711

## Supp. Fig. 14

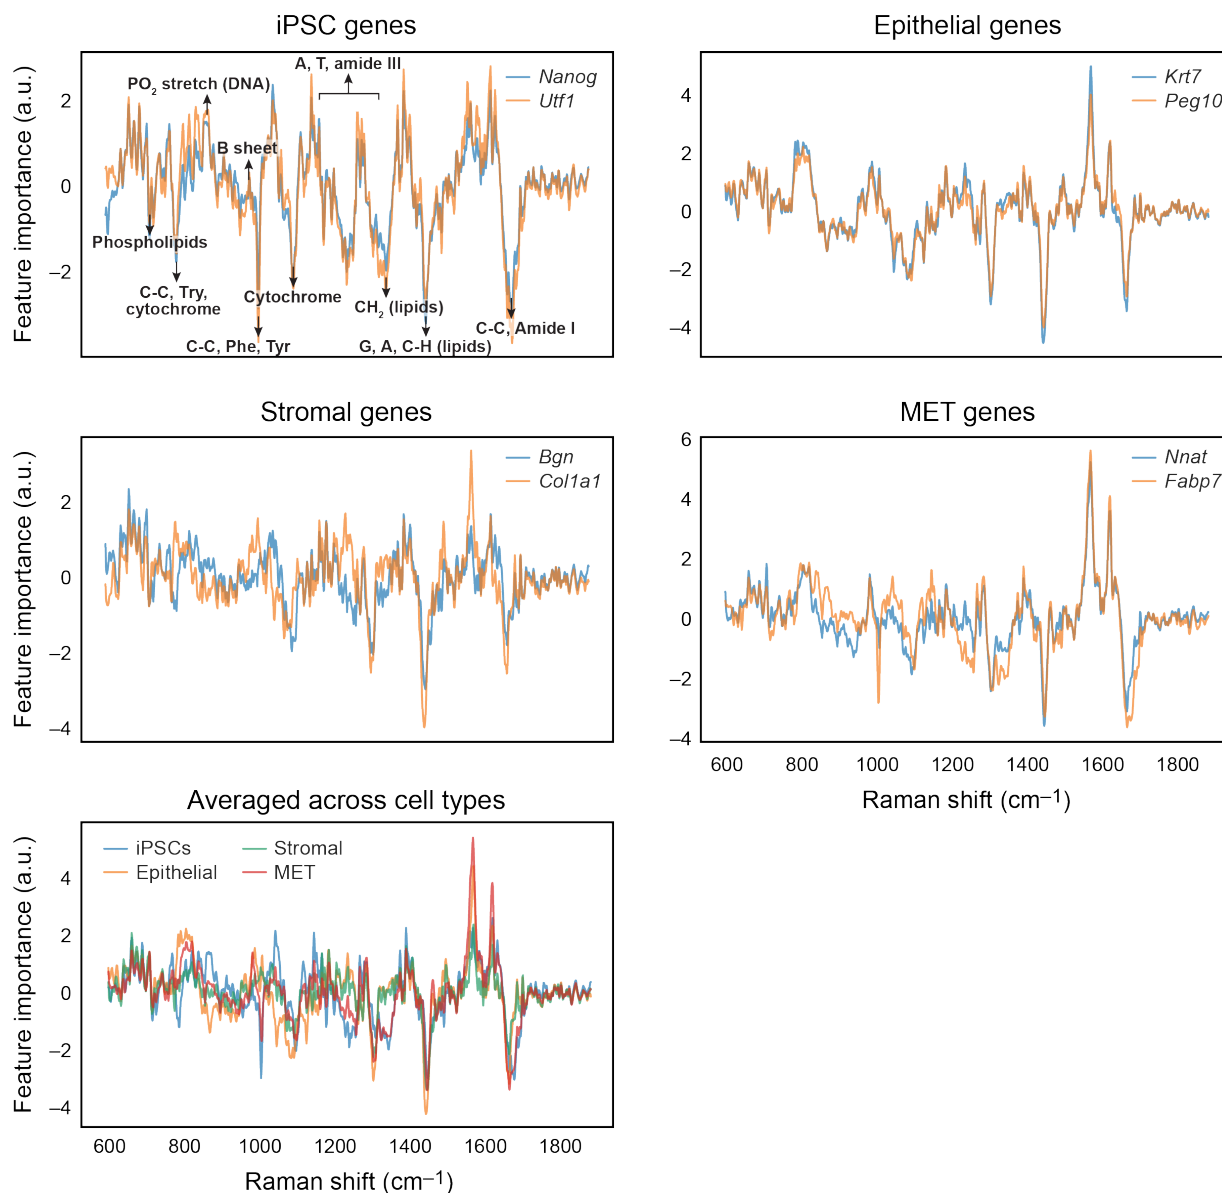

712

713 **Extended Data Fig. 14 | Raman spectral feature importance scores for each smFISH anchor gene**  
 714 **and its average across all genes for a cell type.** Feature importance scores (y axis) for marker genes of  
 715 each cell type (top two rows), and for all cell types (bottom row), along the Raman spectrum (x axis).  
 716 Known signals<sup>18</sup> are annotated in the top left panel (identical to **Fig. 3k**).



717

718

## Supp. Fig. 15

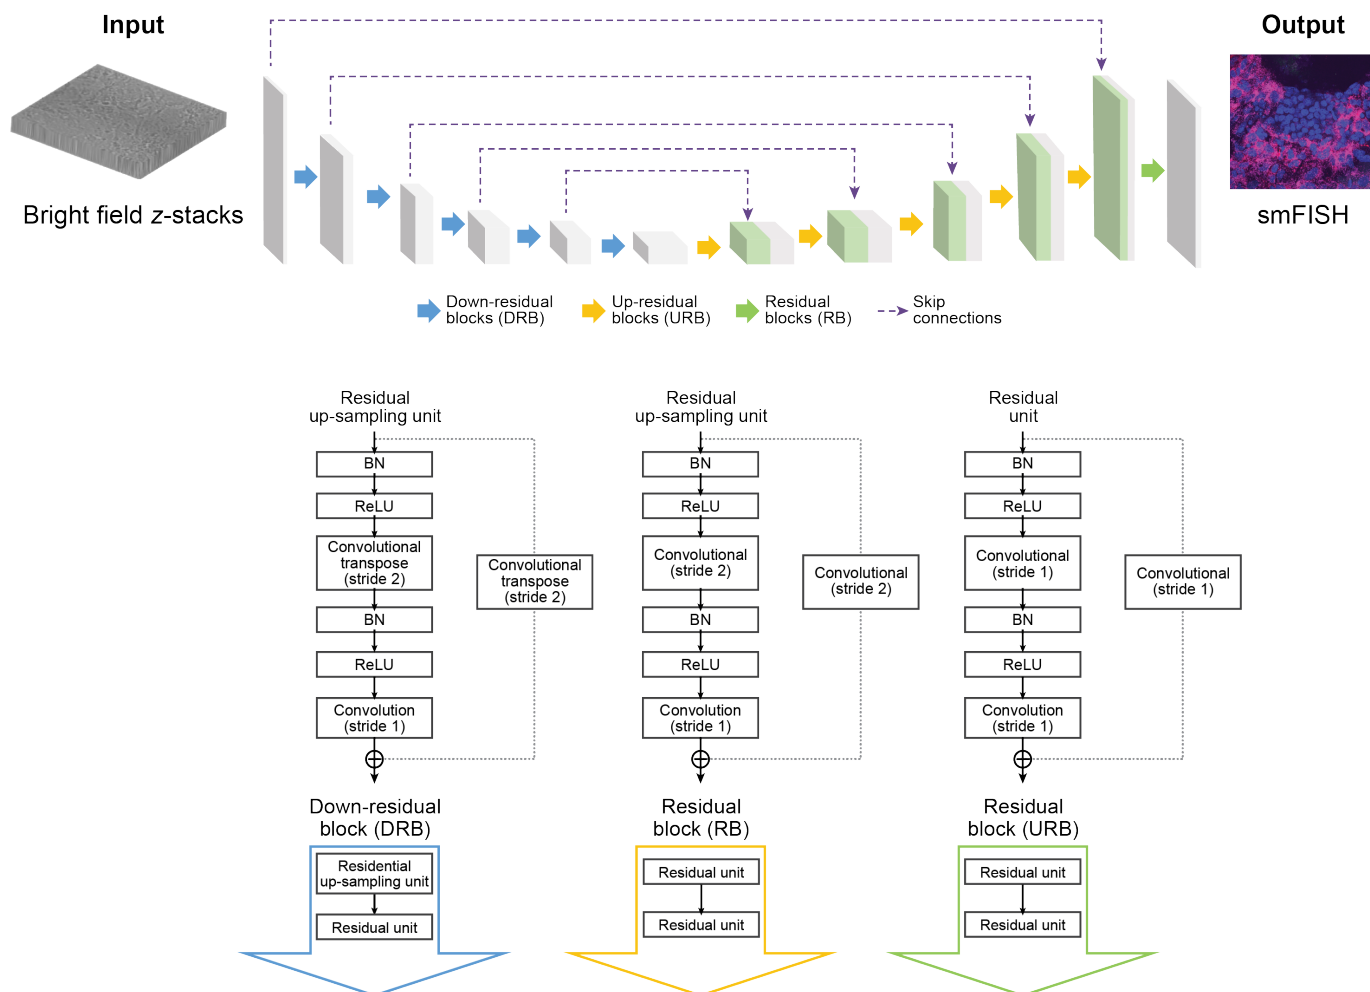

719

720 **Extended Data Fig. 15 | Neural network-based prediction of smFISH using brightfield z-stacks.**

721

## 722 **References**

- 723 1. Tanay, A. & Regev, A. Scaling single-cell genomics from phenomenology to mechanism. *Nature*  
724 **541**, 331–338 (2017).
- 725 2. Trapnell, C. *et al.* The dynamics and regulators of cell fate decisions are revealed by  
726 pseudotemporal ordering of single cells. *Nat. Biotechnol.* **32**, 381–386 (2014).
- 727 3. Schiebinger, G. *et al.* Optimal-Transport Analysis of Single-Cell Gene Expression Identifies  
728 Developmental Trajectories in Reprogramming. *Cell* **176**, 928-943.e22 (2019).
- 729 4. La Manno, G. *et al.* RNA velocity of single cells. *Nature* **560**, 494–498 (2018).
- 730 5. Bergen, V., Lange, M., Peidli, S., Wolf, F. A. & Theis, F. J. Generalizing RNA velocity to transient  
731 cell states through dynamical modeling. *Nat. Biotechnol.* **38**, 1408–1414 (2020).
- 732 6. Wagner, D. E. & Klein, A. M. Lineage tracing meets single-cell omics: opportunities and  
733 challenges. *Nat. Rev. Genet.* **21**, 410–427 (2020).
- 734 7. Wei, L. *et al.* Super-multiplex vibrational imaging. *Nature* **544**, 465–470 (2017).
- 735 8. Kobayashi-Kirschvink, K. J. *et al.* Linear Regression Links Transcriptomic Data and Cellular  
736 Raman Spectra. *Cell Systems* vol. 7 104-117.e4 (2018).
- 737 9. Singh, S. P. *et al.* Label-free characterization of ultra violet-radiation-induced changes in skin  
738 fibroblasts with Raman spectroscopy and quantitative phase microscopy. *Sci. Rep.* **7**, 10829 (2017).
- 739 10. Ichimura, T. *et al.* Visualizing cell state transition using Raman spectroscopy. *PLoS One* **9**, e84478  
740 (2014).
- 741 11. Ho, C.-S. *et al.* Rapid identification of pathogenic bacteria using Raman spectroscopy and deep  
742 learning. *Nat. Commun.* **10**, 4927 (2019).
- 743 12. Stadtfeld, M., Maherali, N., Borkent, M. & Hochedlinger, K. A reprogrammable mouse strain from  
744 gene-targeted embryonic stem cells. *Nat. Methods* **7**, 53–55 (2010).
- 745 13. Choi, H. M. T. *et al.* Third-generation in situ hybridization chain reaction: multiplexed, quantitative,  
746 sensitive, versatile, robust. *Development* **145**, (2018).

- 747 14. McInnes, L., Healy, J., Saul, N. & Großberger, L. UMAP: Uniform Manifold Approximation and  
748 Projection. *J. Open Source Softw.* **3**, 861 (2018).
- 749 15. Prokhorenkova, L., Gusev, G., Vorobev, A., Dorogush, A. V. & Gulin, A. CatBoost: unbiased  
750 boosting with categorical features.
- 751 16. Biancalani, T. *et al.* Deep learning and alignment of spatially resolved single-cell transcriptomes  
752 with Tangram. *Nat. Methods* **18**, 1352–1362 (2021).
- 753 17. He, K., Zhang, X., Ren, S. & Sun, J. Deep residual learning for image recognition. in *2016 IEEE*  
754 *Conference on Computer Vision and Pattern Recognition (CVPR)* (IEEE, 2016).  
755 doi:10.1109/cvpr.2016.90.
- 756 18. Germond, A., Panina, Y., Shiga, M., Niioka, H. & Watanabe, T. M. Following Embryonic Stem  
757 Cells, Their Differentiated Progeny, and Cell-State Changes During iPS Reprogramming by Raman  
758 Spectroscopy. *Anal. Chem.* **92**, 14915–14923 (2020).
- 759 19. Freudiger, C. W. *et al.* Label-free biomedical imaging with high sensitivity by stimulated Raman  
760 scattering microscopy. *Science* **322**, 1857–1861 (2008).
- 761 20. Bai, Y. *et al.* Ultrafast chemical imaging by widefield photothermal sensing of infrared absorption.  
762 *Sci Adv* **5**, eaav7127 (2019).
- 763 21. Tamamitsu, M., Toda, K., Horisaki, R. & Ideguchi, T. Quantitative phase imaging with molecular  
764 vibrational sensitivity. *Opt. Lett.* **44**, 3729–3732 (2019).
- 765 22. Cleary, B., Cong, L., Cheung, A., Lander, E. S. & Regev, A. Efficient Generation of Transcriptomic  
766 Profiles by Random Composite Measurements. *Cell* **171**, 1424-1436.e18 (2017).
- 767 23. Eng, C.-H. L. *et al.* Transcriptome-scale super-resolved imaging in tissues by RNA seqFISH. *Nature*  
768 **568**, 235–239 (2019).
- 769 24. Chen, K. H., Boettiger, A. N., Moffitt, J. R., Wang, S. & Zhuang, X. RNA imaging. Spatially  
770 resolved, highly multiplexed RNA profiling in single cells. *Science* **348**, aaa6090 (2015).
- 771 25. Wang, X. *et al.* Three-dimensional intact-tissue sequencing of single-cell transcriptional states.  
772 *Science* (2018) doi:10.1126/science.aat5691.

- 773 26. Alon, S. *et al.* Expansion sequencing: Spatially precise in situ transcriptomics in intact biological  
774 systems. *Science* **371**, (2021).
- 775 27. Yang, K. D. *et al.* Multi-domain translation between single-cell imaging and sequencing data using  
776 autoencoders. *Nat. Commun.* **12**, 31 (2021).
- 777 28. Edelstein, A., Amodaj, N., Hoover, K., Vale, R. & Stuurman, N. Computer control of microscopes  
778 using  $\mu$ Manager. *Curr. Protoc. Mol. Biol.* **Chapter 14**, Unit14.20 (2010).
- 779 29. Stuart, T. *et al.* Comprehensive Integration of Single-Cell Data. *Cell* **177**, 1888-1902.e21 (2019).
- 780 30. Wolf, F. A., Angerer, P. & Theis, F. J. SCANPY: large-scale single-cell gene expression data  
781 analysis. *Genome Biol.* **19**, 15 (2018).
- 782
